# Supplementary material for: New Drimane Sesquiterpenes and Polyketides from Marine-Derived Fungus Penicillium sp. TW58-16 and Their Anti-Inflammatory and α-Glucosidase Inhibitory Effects
Source: MDPI journal article supplement (doi:10.3390/md19080416), 2021-07-26
Supplement: s1 [file s1]

## Supporting information

### **New Drimane Sesquiterpenes and Polyketides from Marine-Derived Fungus *Penicillium sp.* TW58-16 and their Anti-Inflammatory and $\alpha$ -Glucosidase Inhibitory Effects**

**Xiaoshuang Gou<sup>1,†</sup>, Danmei Tian<sup>1,†</sup>, Jihua Wei<sup>2,†</sup>, Mei Chen<sup>1</sup>, Wenjuan Ding<sup>1</sup>, Bin Wu<sup>2,\*</sup> and  
Jinshan Tang<sup>1,\*</sup>**

<sup>1</sup> Institute of Traditional Chinese Medicine and Natural Products, International Cooperative Laboratory of Traditional Chinese Medicine Modernization and Innovative Drug Development of Chinese Ministry of Education (MOE), College of Pharmacy, Jinan University, Guangzhou 510632, China

<sup>2</sup> Ocean College, Zhejiang University, Zhoushan Campus, Zhoushan 316021, Zhejiang, China

\* Correspondence: gztangjinshan@126.com; Tel.: +86-20-85221559 (J.T.); wubin@zju.edu.com; Tel.: +86-580-2092258 (B.W.)

<sup>†</sup> These authors contributed equally to this work.

### Single Mass Analysis

Tolerance = 5.0 mDa / DBE: min = -1.5, max = 50.0

Element prediction: Off

Number of isotope peaks used for i-FIT = 3

Monoisotopic Mass, Even Electron Ions

40 formula(e) evaluated with 1 results within limits (up to 50 best isotopic matches for each mass)

Elements Used:

C: 0-500 H: 0-1000 O: 0-200

20190909-6 87 (0.718)

1: TOF MS ES+  
6.14e+005

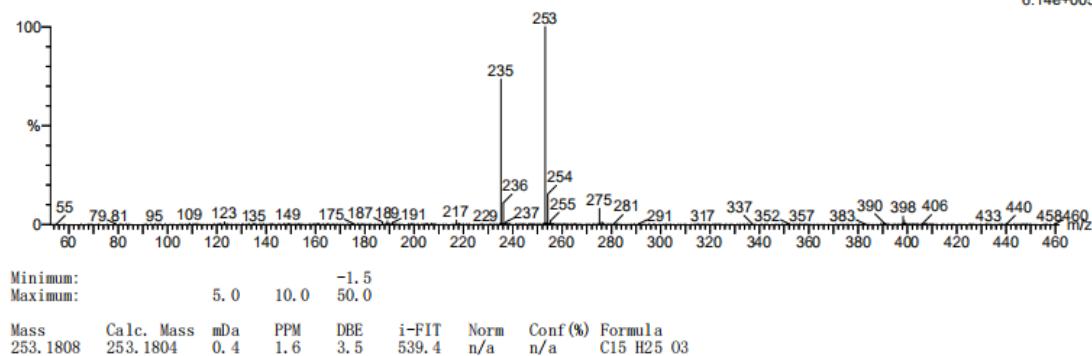

Figure S1 HR-ESI-MS spectrum of compound 1

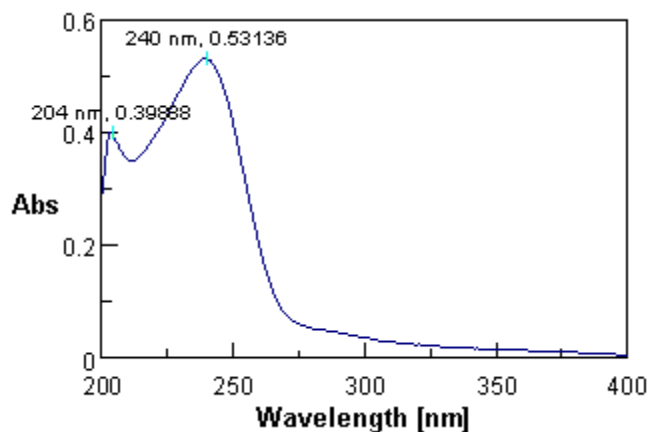

Figure S2 UV spectrum of compound 1

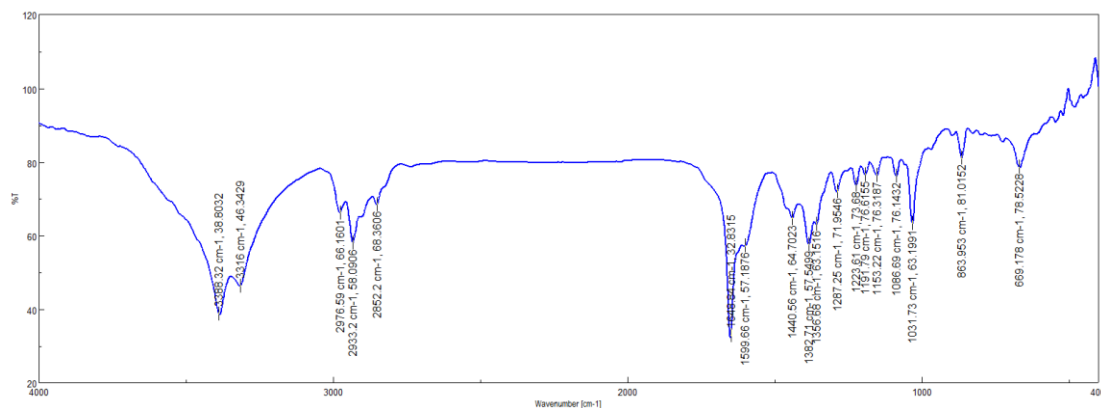

Figure S3 IR spectrum of compound 1

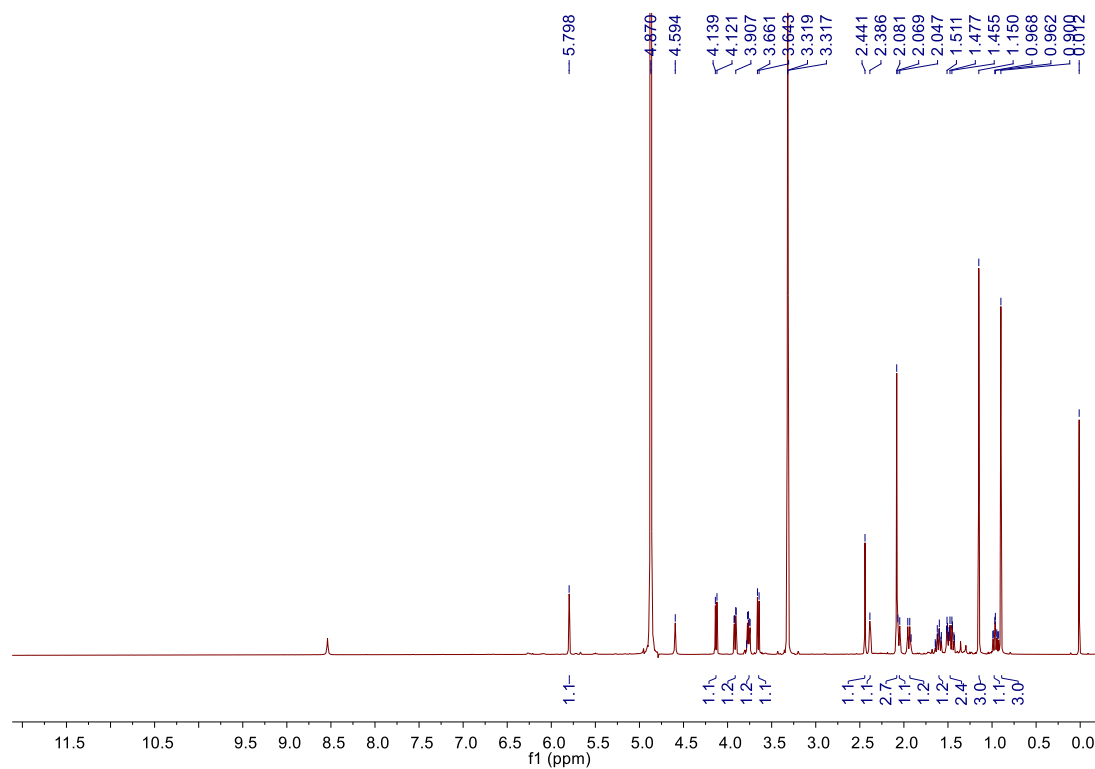

**Figure S4** <sup>1</sup>H-NMR spectrum of compound **1** (in CD<sub>3</sub>OD)

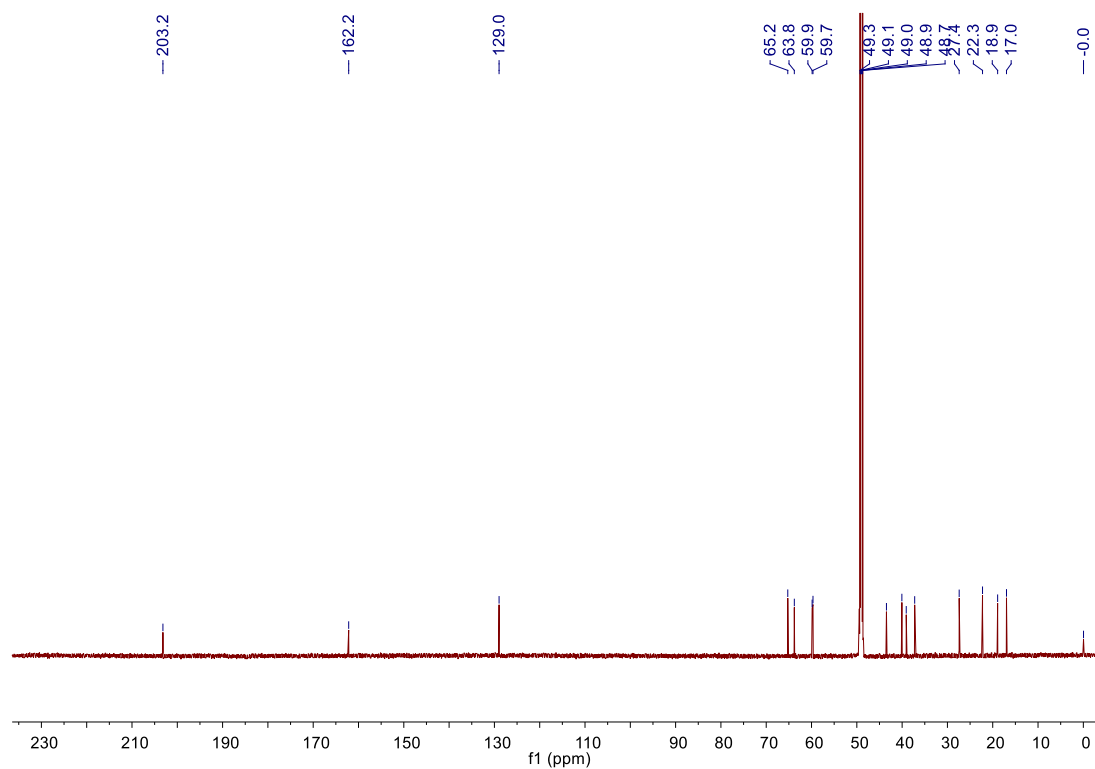

**Figure S5** <sup>13</sup>C-NMR spectrum of compound **1** (in CD<sub>3</sub>OD)

TW58-16-10-3-2

C13DEPT135 MeOD [D:\Data] gouxiaoshuang 22

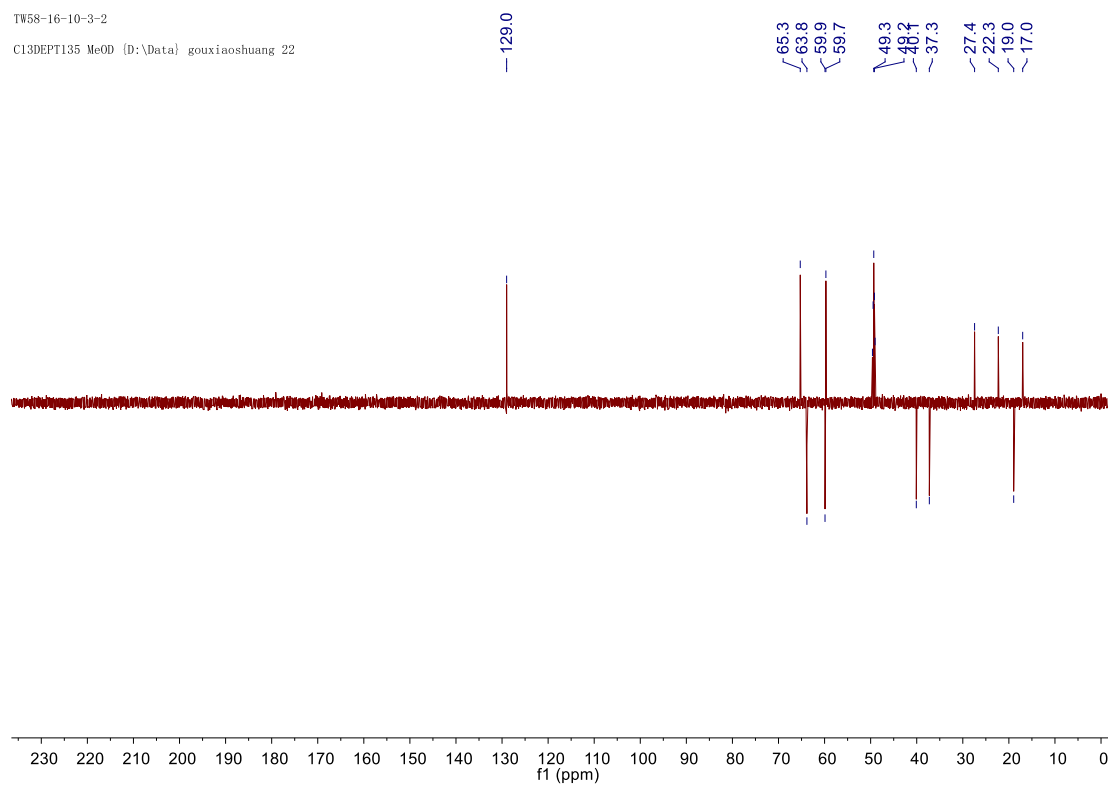

**Figure S6** The DEPT135 spectrum of compound **1** (in CD<sub>3</sub>OD)

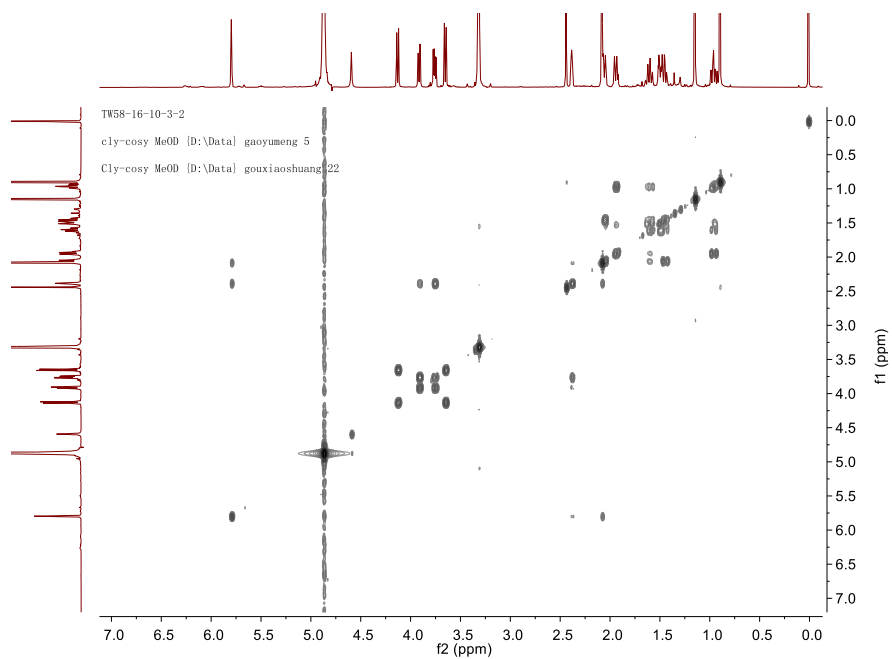

**Figure S7** <sup>1</sup>H-<sup>1</sup>H COSY spectrum of compound **1** (in CD<sub>3</sub>OD)

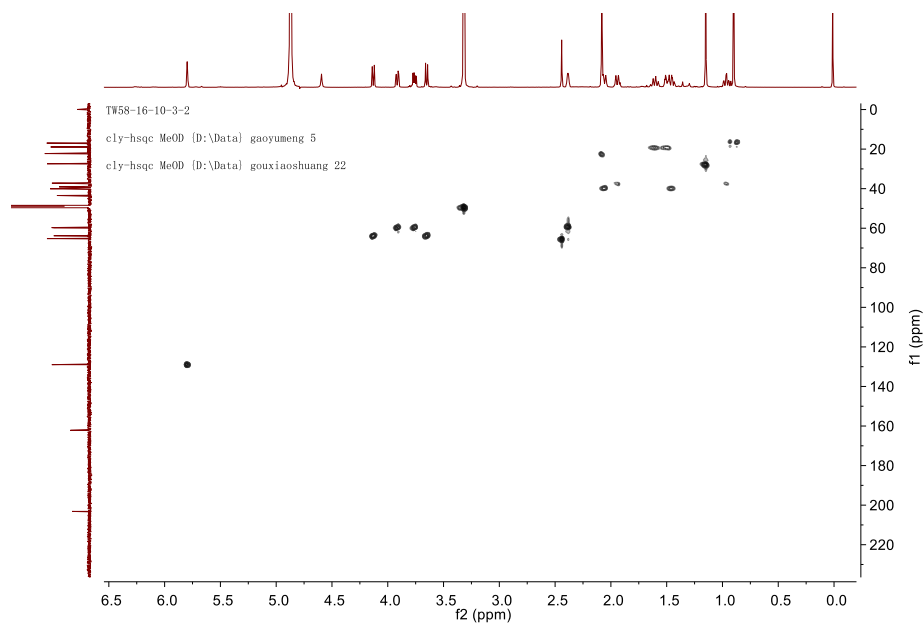

**Figure S8** HSQC spectrum of compound **1** (in CD<sub>3</sub>OD)

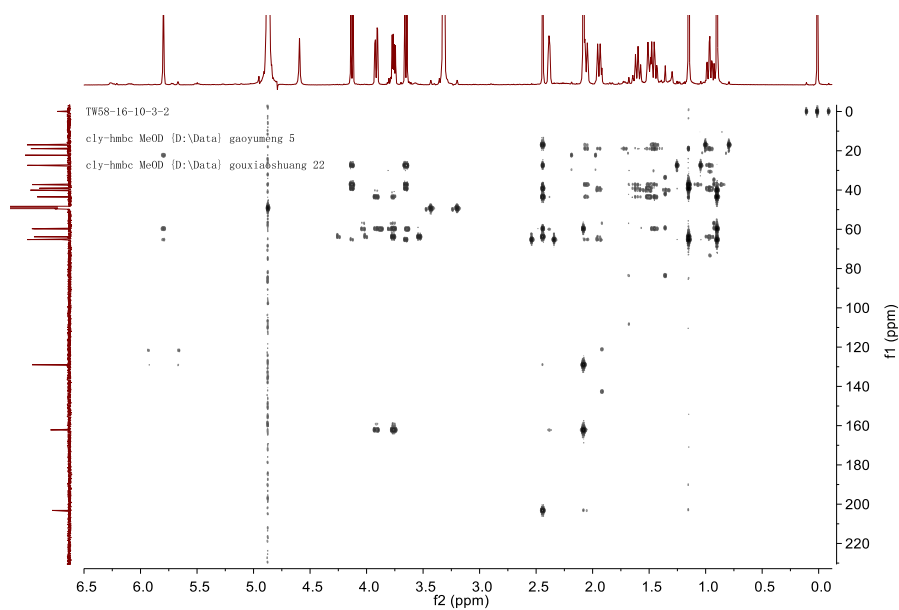

**Figure S9** HMBC spectrum of compound **1** (in CD<sub>3</sub>OD)

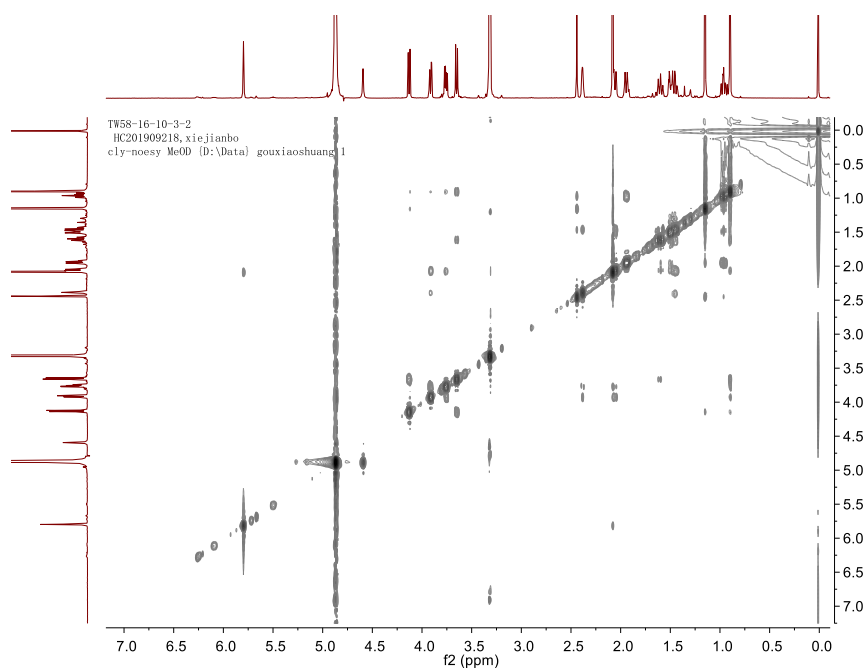

**Figure S10** The NOESY spectrum of compound **1** (in CD<sub>3</sub>OD)

#### Single Mass Analysis

Tolerance = 5.0 mDa / DBE: min = -1.5, max = 50.0

Element prediction: Off

Number of isotope peaks used for i-FIT = 3

Monoisotopic Mass, Even Electron Ions

47 formula(e) evaluated with 1 results within limits (up to 50 best isotopic matches for each mass)

Elements Used:

C: 0-500 H: 0-1000 O: 0-200

20190909-7 110 (0.901)

1: TOF MS ES+  
2.02e+005

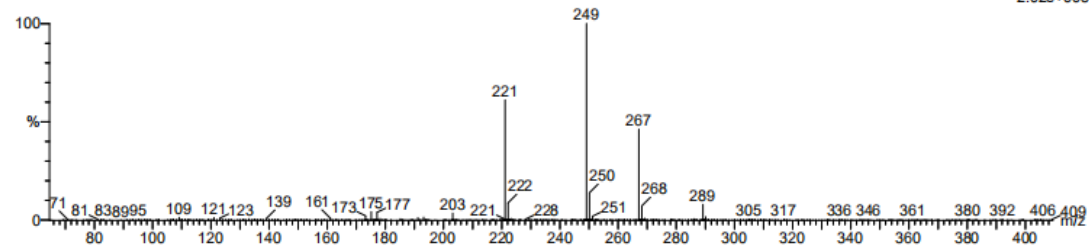

Minimum: -1.5  
Maximum: 50.0

| Mass     | Calc. Mass | mDa  | PPM  | DBE | i-FIT | Norm | Conf (%) | Formula    |
|----------|------------|------|------|-----|-------|------|----------|------------|
| 267.1591 | 267.1596   | -0.5 | -1.9 | 4.5 | 236.0 | n/a  | n/a      | C15 H23 O4 |

**Figure S11** HR-ESI-MS spectrum of compound **2**

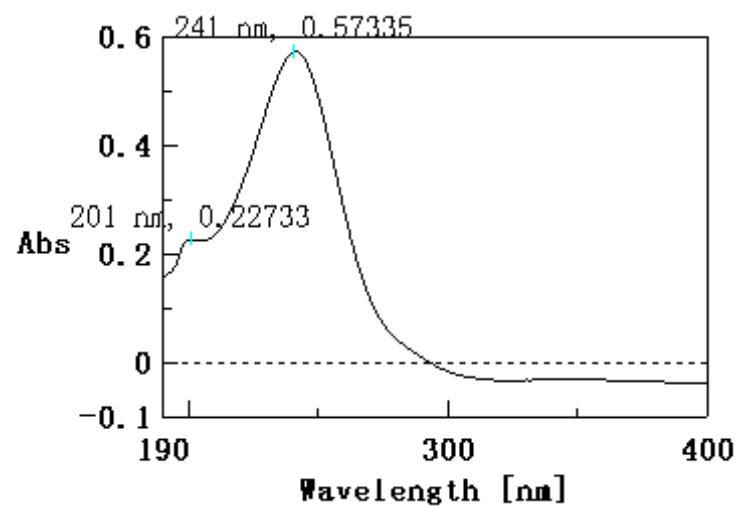

Figure S12 UV spectrum of compound 2

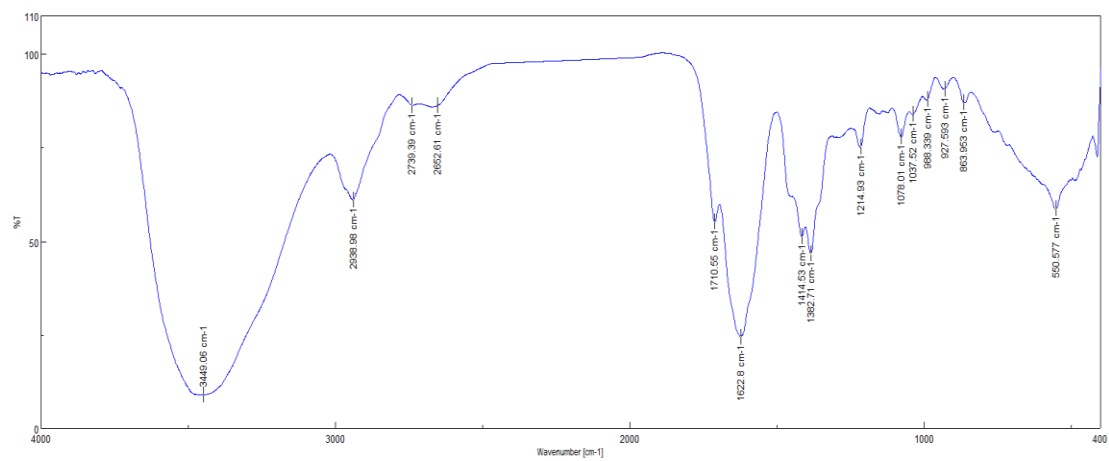

Figure S13 IR spectrum of compound 2

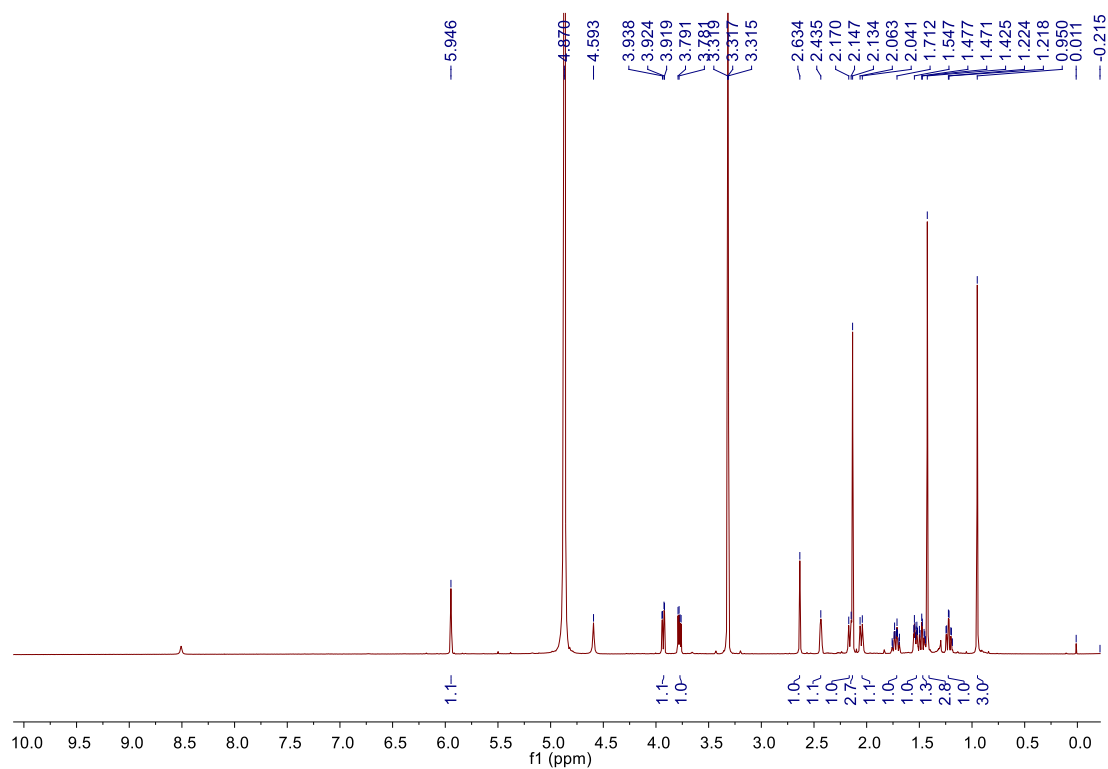

**Figure S14**  $^1\text{H}$ -NMR spectrum of compound **2** (in  $\text{CD}_3\text{OD}$ )

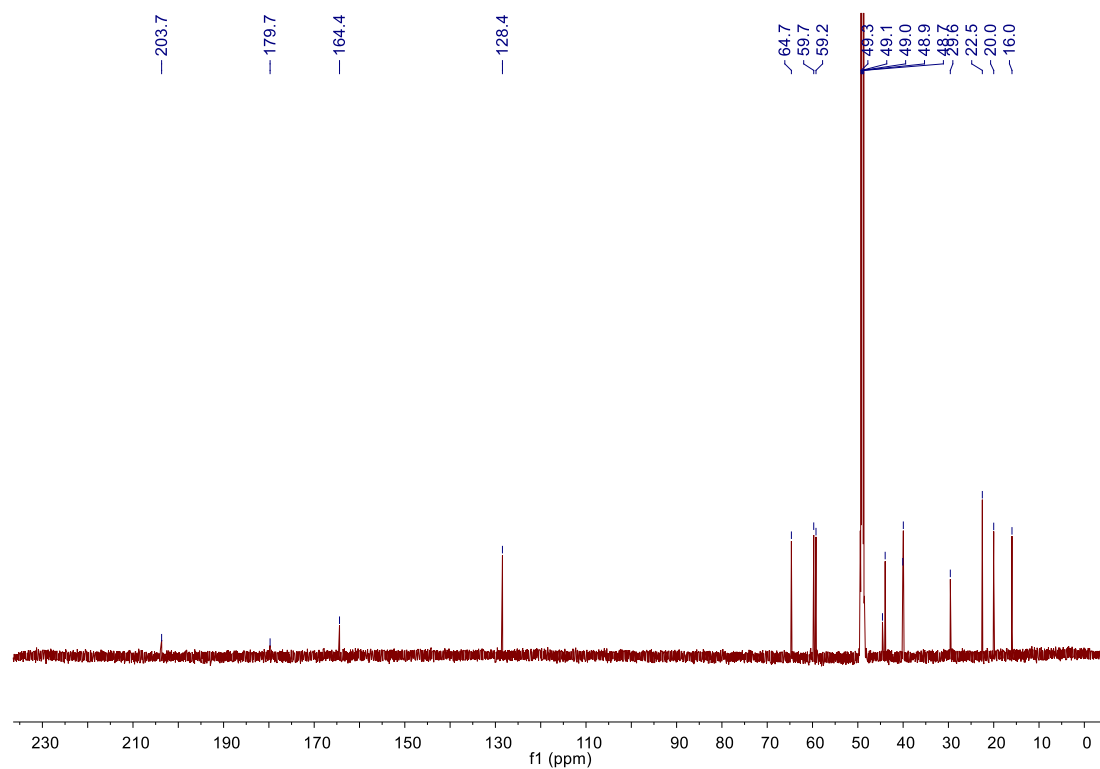

**Figure S15**  $^{13}\text{C}$ -NMR spectrum of compound **2** (in  $\text{CD}_3\text{OD}$ )



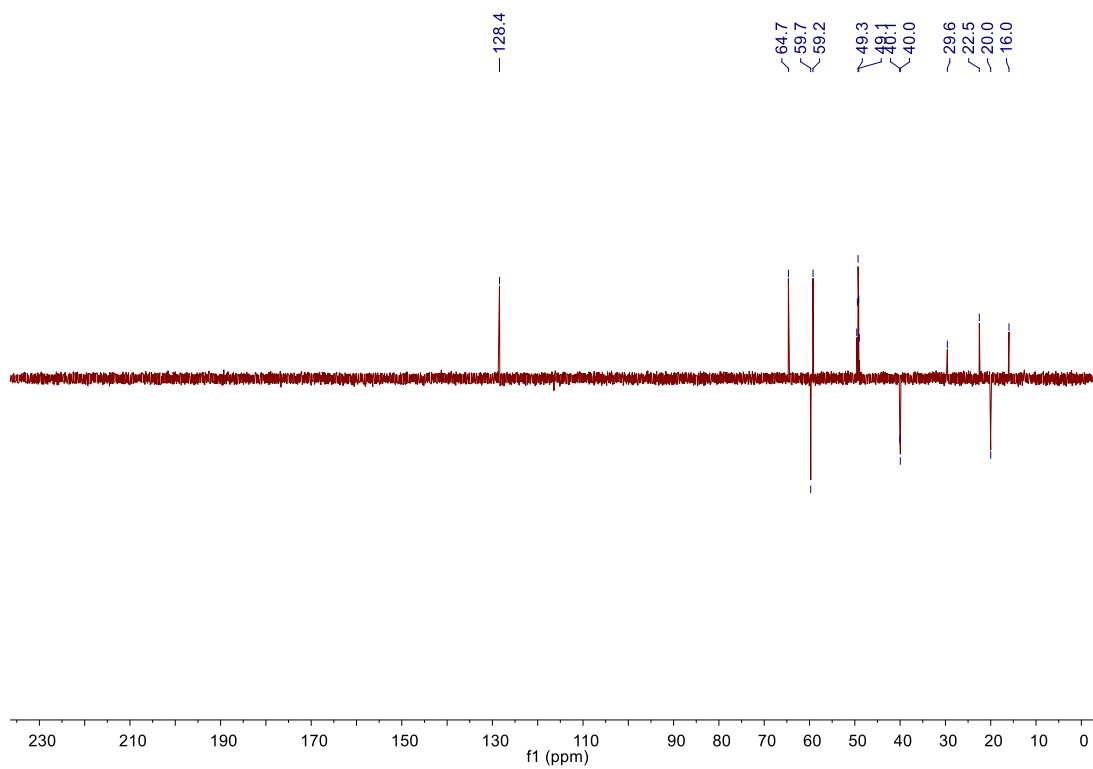

**Figure S16** The DEPT135 spectrum of compound **2** (in  $\text{CD}_3\text{OD}$ )

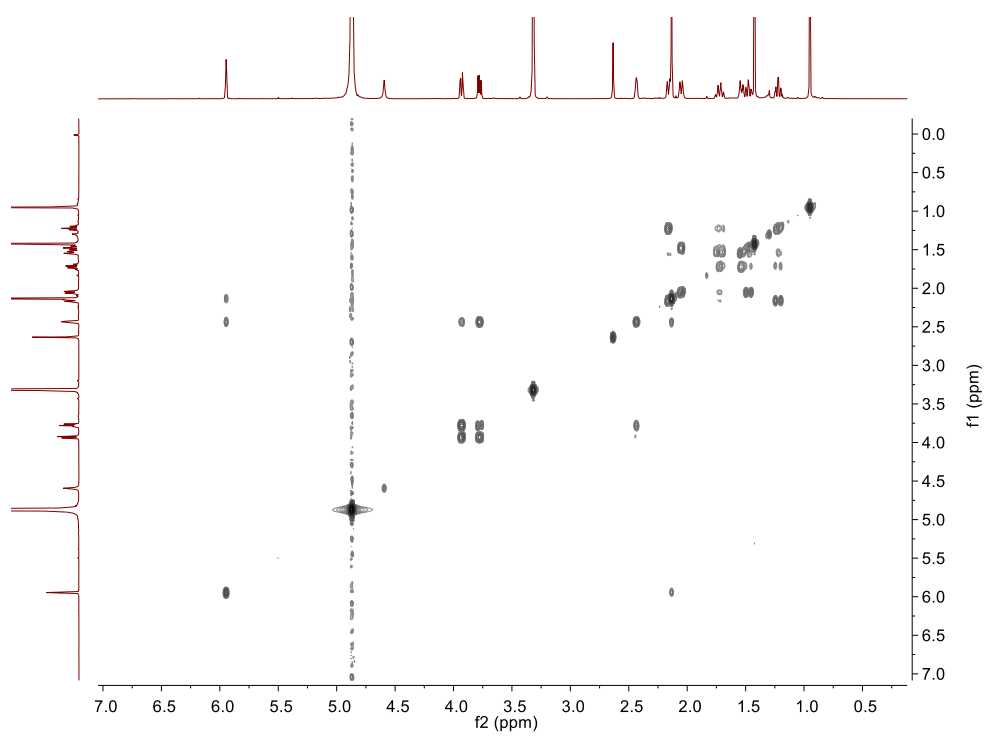

**Figure S17**  $^1\text{H}$ - $^1\text{H}$  COSY spectrum of compound **2** (in  $\text{CD}_3\text{OD}$ )

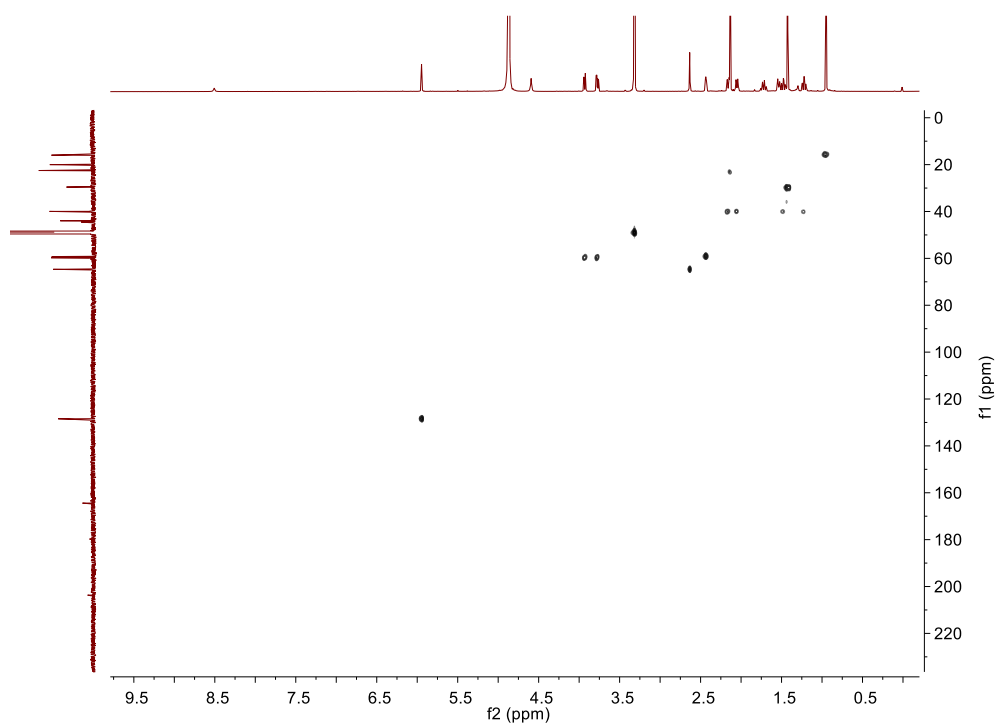

**Figure S18** HSQC spectrum of compound **2** (in CD<sub>3</sub>OD)

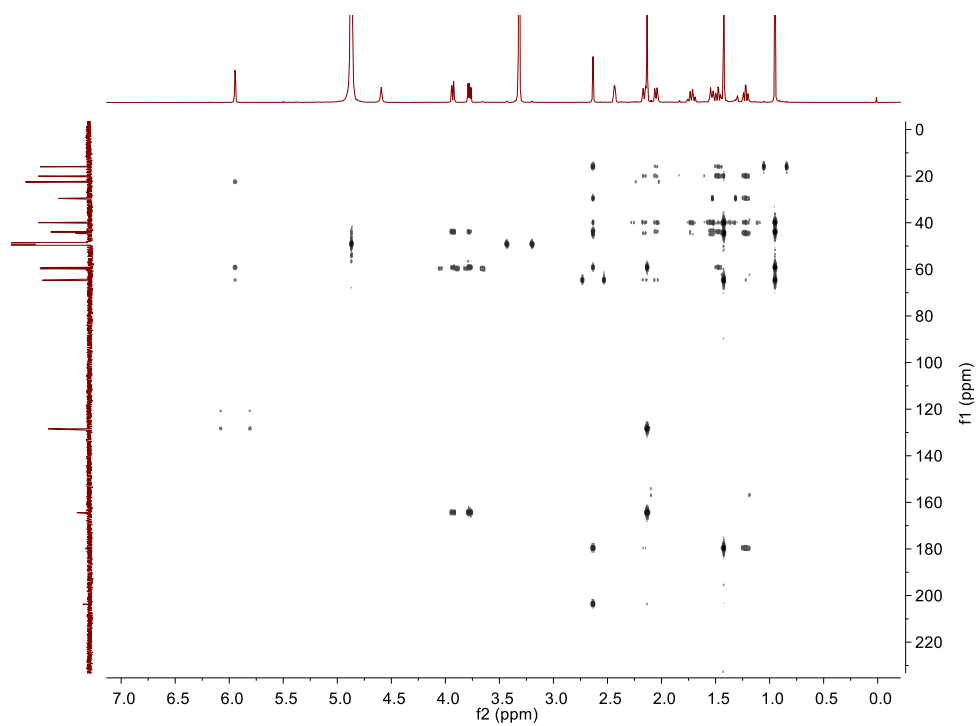

**Figure S19** HMBC spectrum of compound **2** (in CD<sub>3</sub>OD)

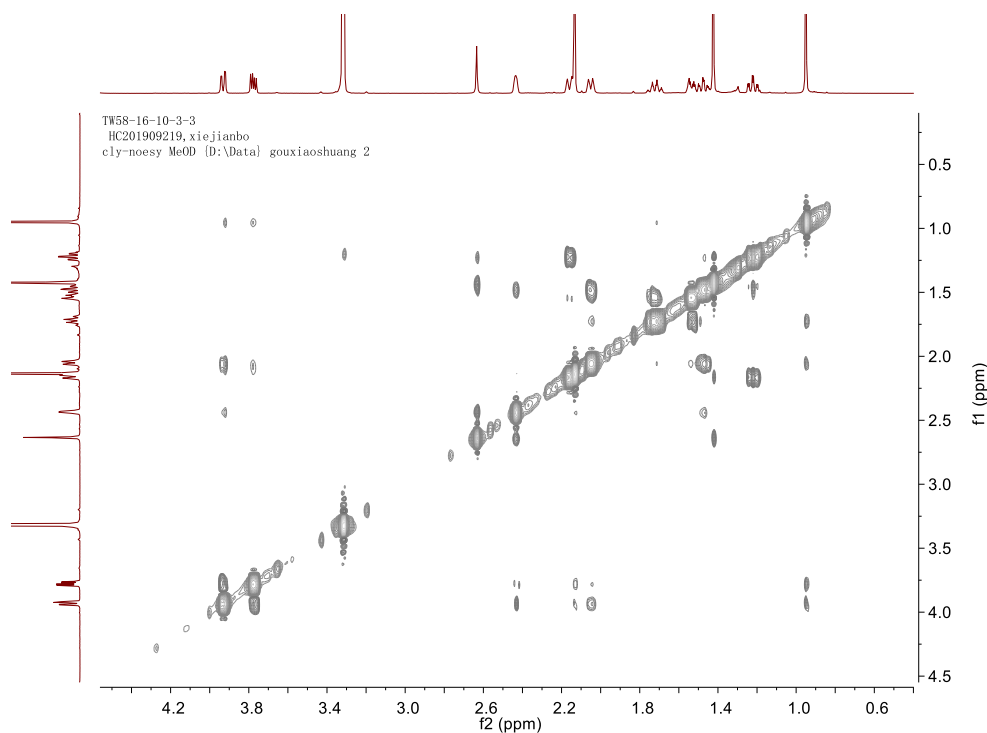

**Figure S20** The NOESY spectrum of compound **2** (in CD<sub>3</sub>OD)

#### Single Mass Analysis

Tolerance = 5.0 mDa / DBE: min = -1.5, max = 50.0

Element prediction: Off

Number of isotope peaks used for i-FIT = 3

Monoisotopic Mass, Even Electron Ions

287 formula(e) evaluated with 4 results within limits (up to 50 best isotopic matches for each mass)

Elements Used:

C: 0-500 H: 0-1000 N: 0-200 O: 0-200

20190909-9 99 (0.808)

1: TOF MS ES+  
2.90e+004

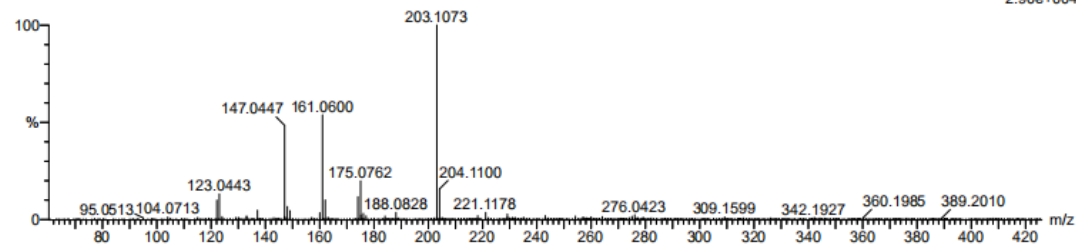

Minimum: -1.5  
Maximum: 5.0 10.0 50.0

| Mass     | Calc. Mass | mDa  | PPM   | DBE | i-FIT | Norm  | Conf(%) | Formula       |
|----------|------------|------|-------|-----|-------|-------|---------|---------------|
| 221.1178 | 221.1178   | 0.0  | 0.0   | 5.5 | 78.2  | 0.345 | 70.81   | C13 H17 O3    |
| 221.1151 | 221.1151   | 2.7  | 12.2  | 6.5 | 79.6  | 1.784 | 16.79   | C9 H13 N6 O   |
| 221.1137 | 221.1137   | 4.1  | 18.5  | 1.5 | 80.2  | 2.329 | 9.74    | C8 H17 N2 O5  |
| 221.1223 | 221.1223   | -4.5 | -20.4 | 2.5 | 81.5  | 3.627 | 2.66    | C3 H13 N10 O2 |

**Figure S21** HR-ESI-MS spectrum of compound **3**

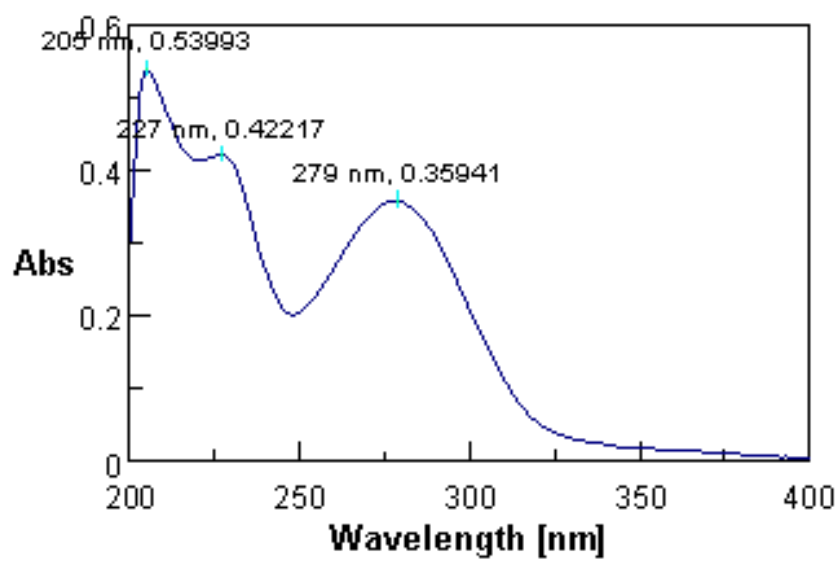

Figure S22 UV spectrum of compound 3

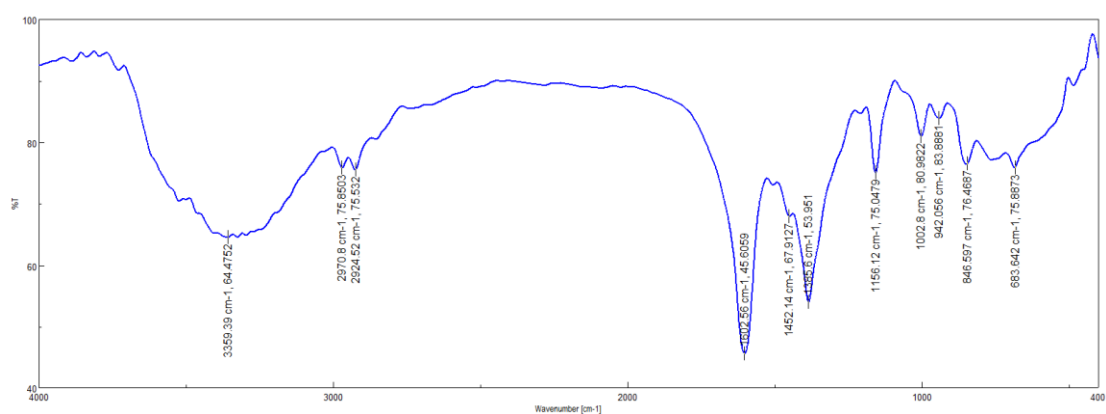

Figure S23 IR spectrum of compound 3

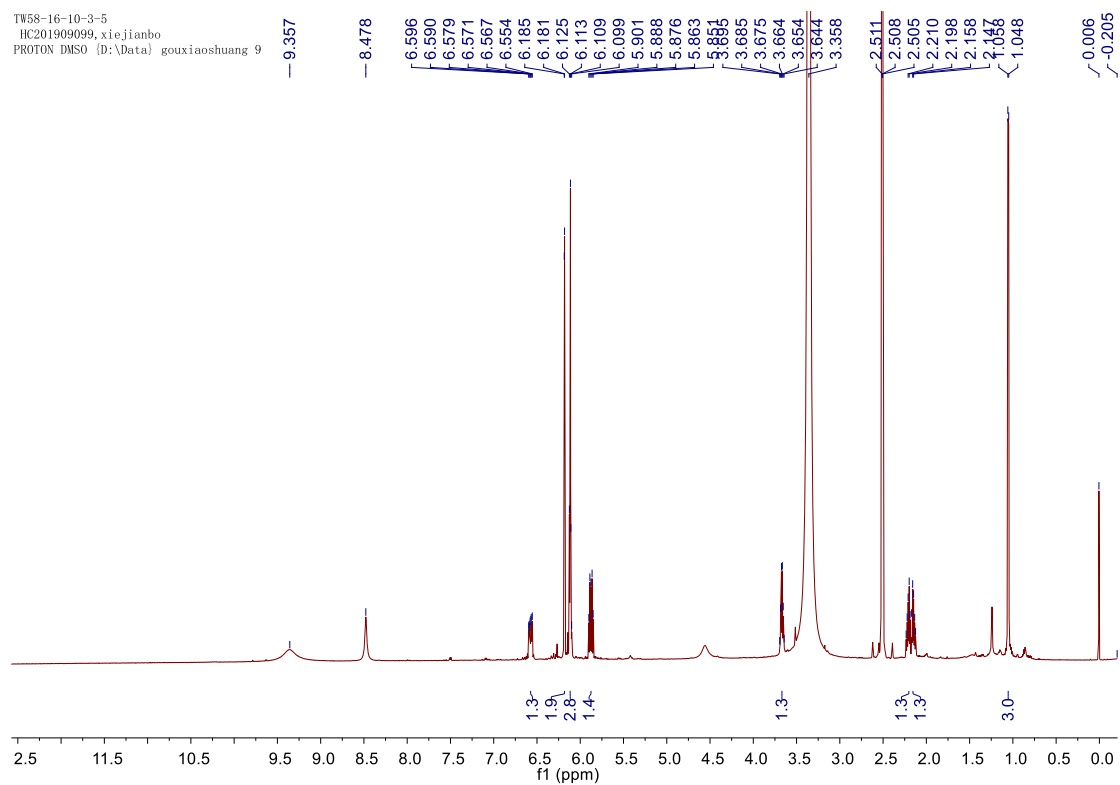

**Figure S24**  $^1\text{H}$ -NMR spectrum of compound **3** (in  $\text{DMSO-}d_6$ )

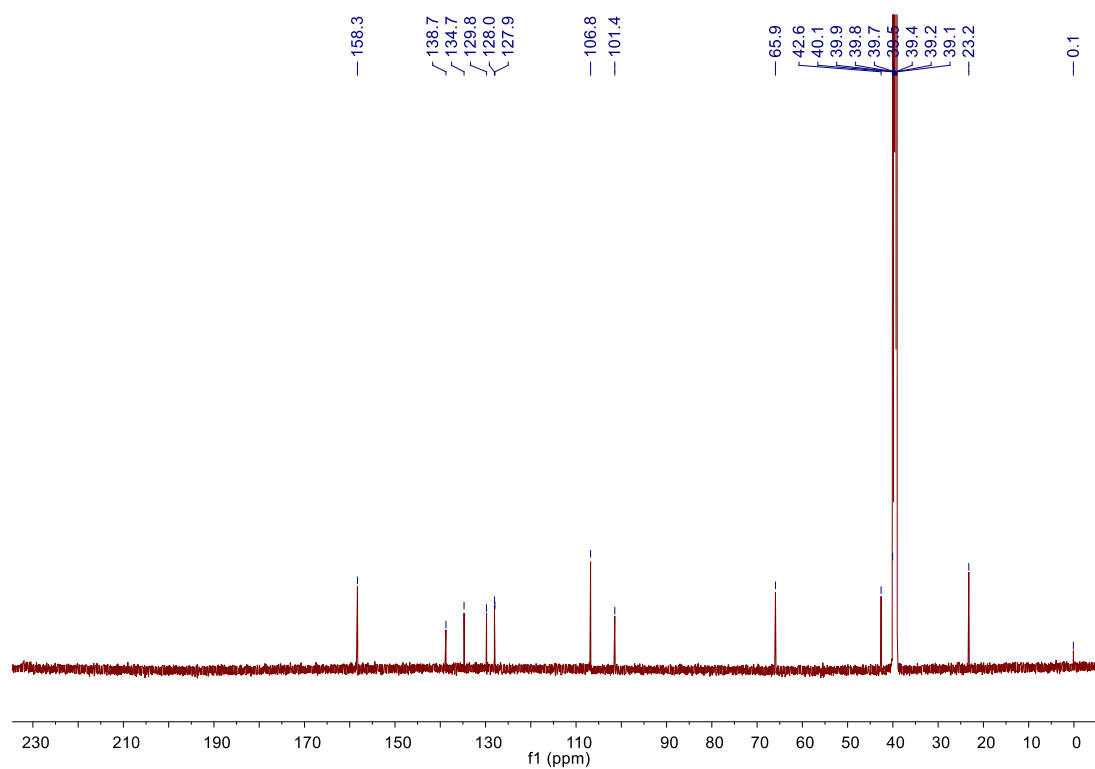

**Figure S25**  $^{13}\text{C}$ -NMR spectrum of compound **3** (in  $\text{DMSO-}d_6$ )

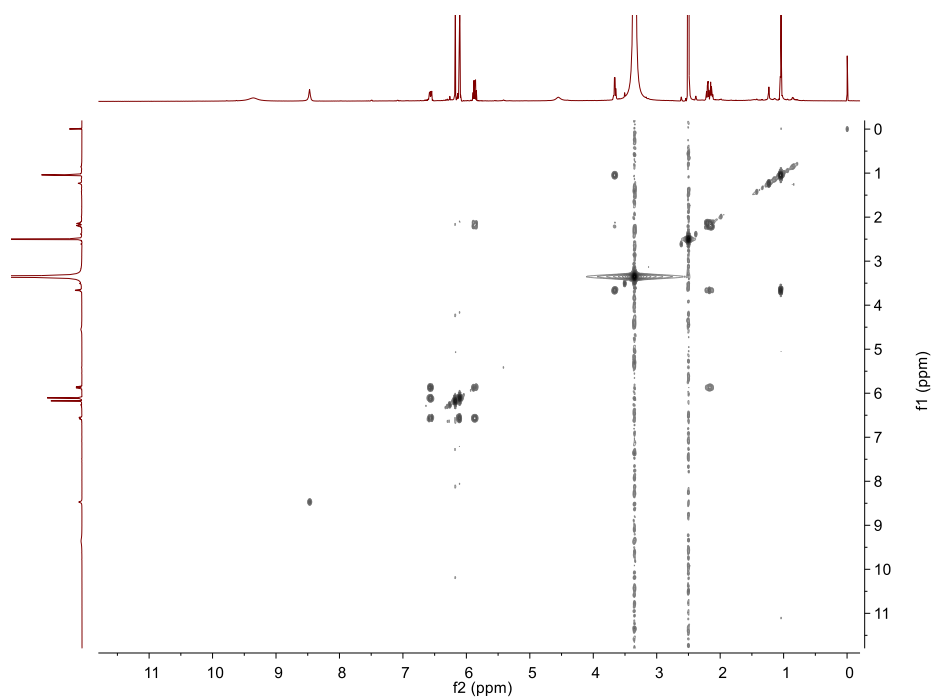

**Figure S26**  $^1\text{H}$ - $^1\text{H}$  COSY spectrum of compound **3** (in  $\text{DMSO-}d_6$ )

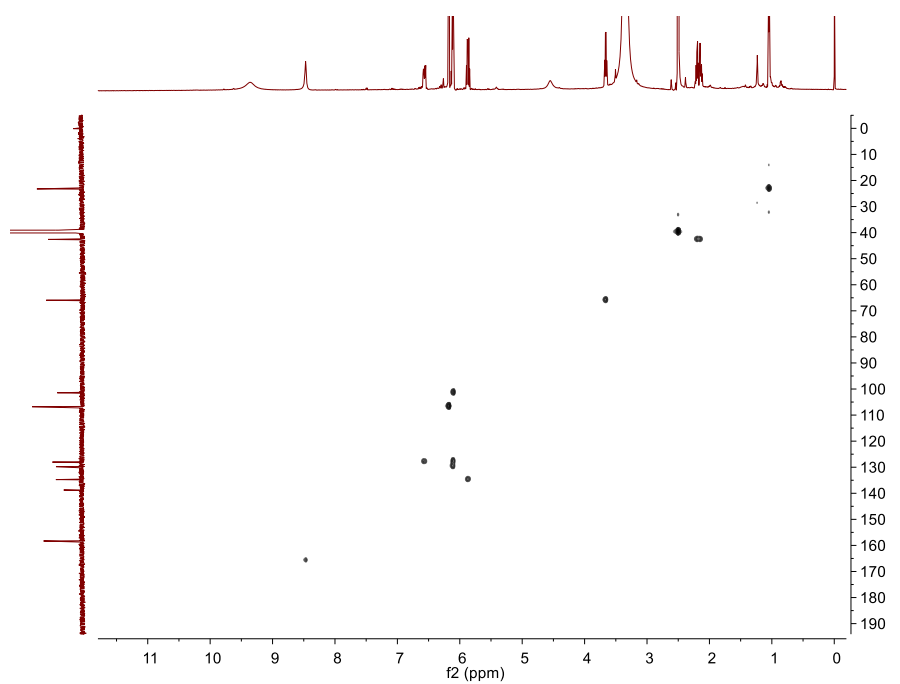

**Figure S27** HSQC spectrum of compound **3** (in  $\text{DMSO-}d_6$ )

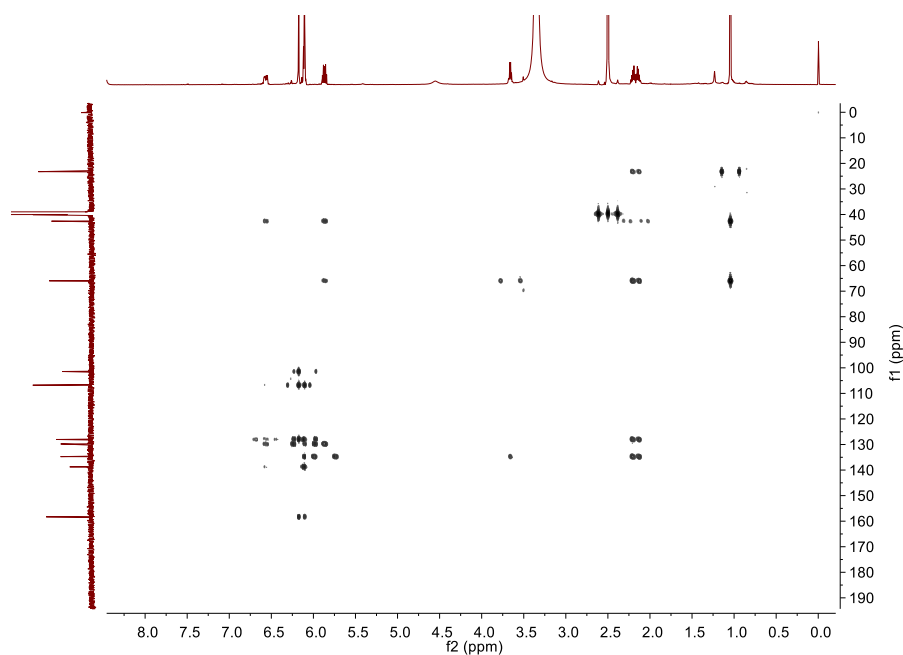

**Figure S28** HMBC spectrum of compound **3** (in DMSO- $d_6$ )

#### Single Mass Analysis

Tolerance = 5.0 mDa / DBE: min = -1.5, max = 50.0

Element prediction: Off

Number of isotope peaks used for i-FIT = 3

Monoisotopic Mass, Even Electron Ions

445 formula(e) evaluated with 7 results within limits (up to 50 best isotopic matches for each mass)

Elements Used:

C: 0-500 H: 0-1000 N: 0-200 O: 0-200

20190923011 95 (0.778)

1: TOF MS ES+  
6.56e+004

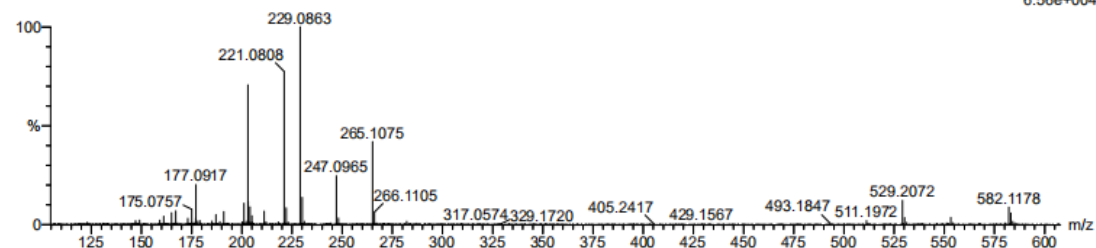

Minimum: 5.0 10.0 -1.5  
Maximum:

| Mass     | Calc. Mass | mDa  | PPM   | DBE  | i-FIT | Norm   | Conf (%) | Formula       |
|----------|------------|------|-------|------|-------|--------|----------|---------------|
| 265.1075 | 265.1076   | -0.1 | -0.4  | 6.5  | 186.5 | 0.112  | 89.45    | C14 H17 O5    |
|          | 265.1049   | 2.6  | 9.8   | 7.5  | 189.0 | 2.629  | 7.22     | C10 H13 N6 O3 |
|          | 265.1089   | -1.4 | -5.3  | 11.5 | 189.9 | 3.472  | 3.11     | C15 H13 N4 O  |
|          | 265.1036   | 3.9  | 14.7  | 2.5  | 192.5 | 6.064  | 0.23     | C9 H17 N2 O7  |
|          | 265.1121   | -4.6 | -17.4 | 3.5  | 198.5 | 12.118 | 0.00     | C4 H13 N10 O4 |
|          | 265.1108   | -3.3 | -12.4 | -1.5 | 198.5 | 12.137 | 0.00     | C3 H17 N6 O8  |
|          | 265.1094   | -1.9 | -7.2  | 4.5  | 203.2 | 16.810 | 0.00     | H9 N16 O2     |

**Figure S29** HR-ESI-MS spectrum of compound **4**

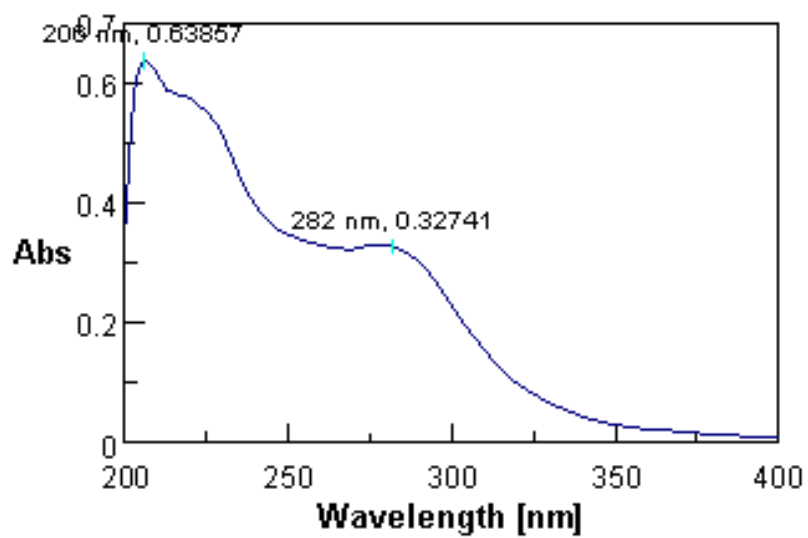

**Figure S30** UV spectrum of compound **4**

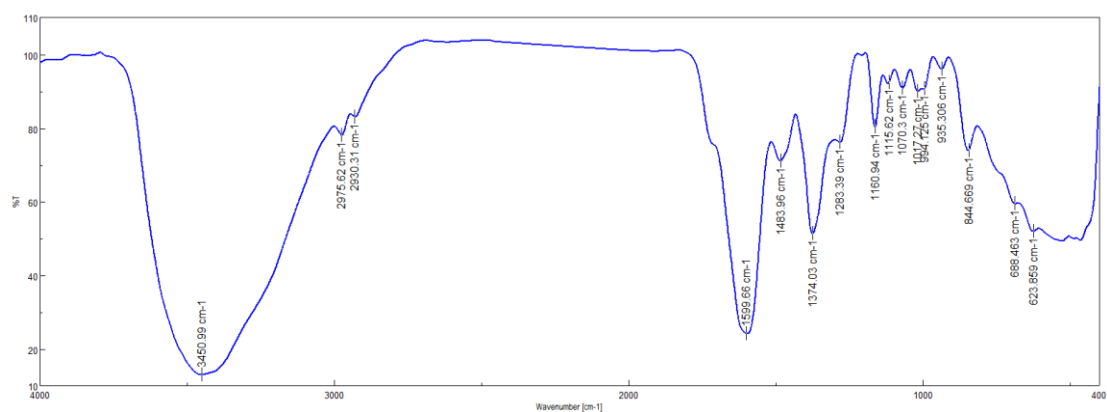

**Figure S31** IR spectrum of compound **4**



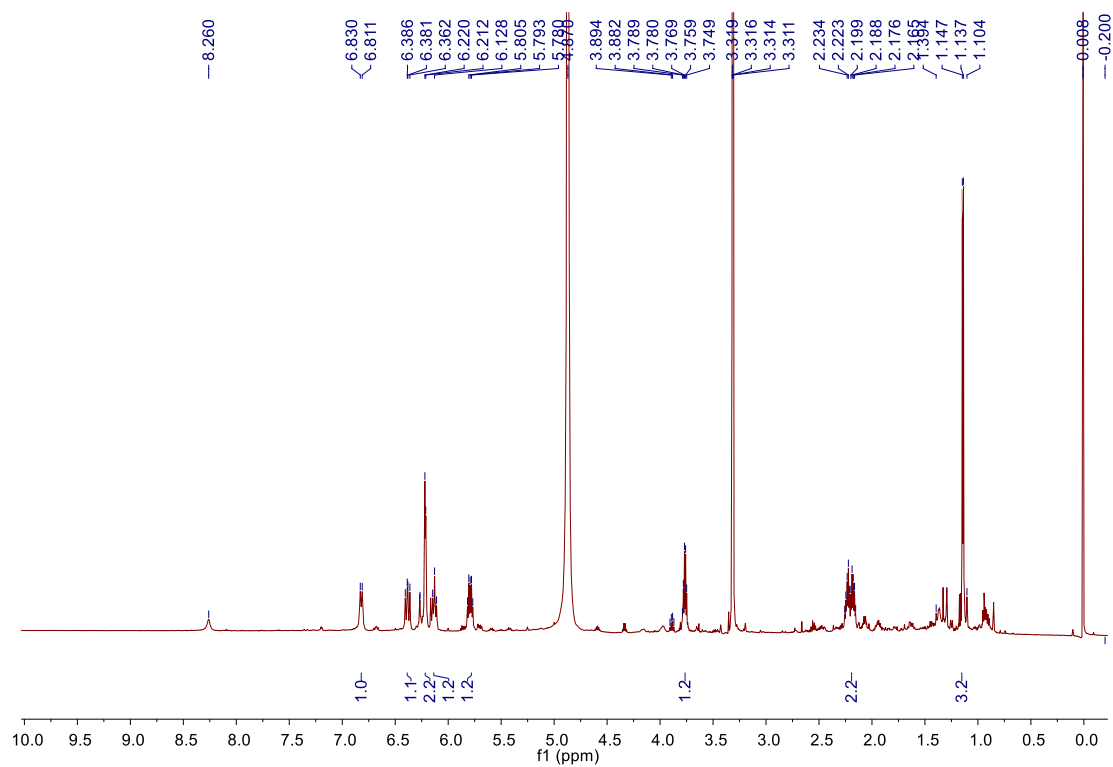

**Figure S32** <sup>1</sup>H-NMR spectrum of compound **4** (in CD<sub>3</sub>OD)

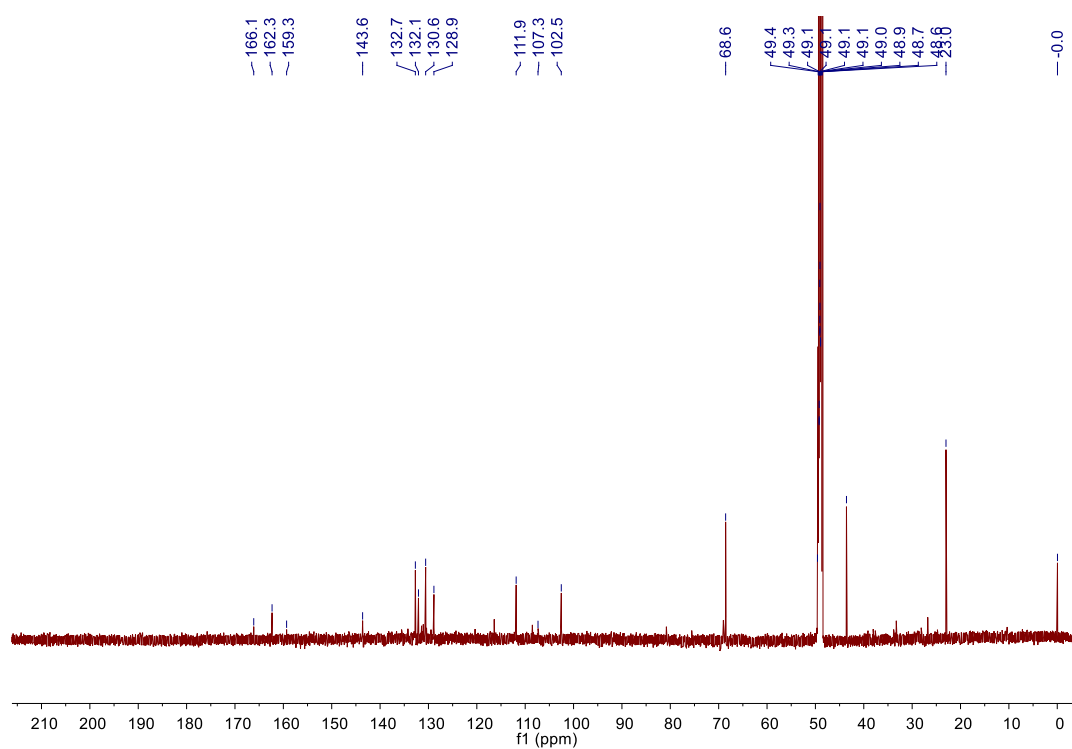

**Figure S33** <sup>13</sup>C-NMR spectrum of compound **4** (in CD<sub>3</sub>OD)

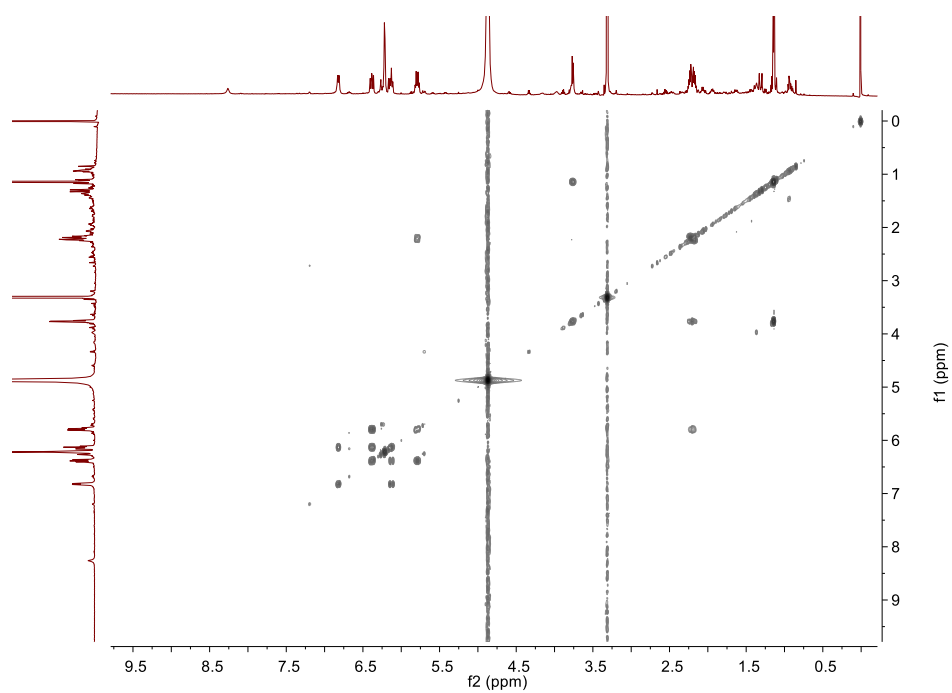

**Figure S34**  $^1\text{H}$ - $^1\text{H}$  COSY spectrum of compound **4** (in  $\text{CD}_3\text{OD}$ )

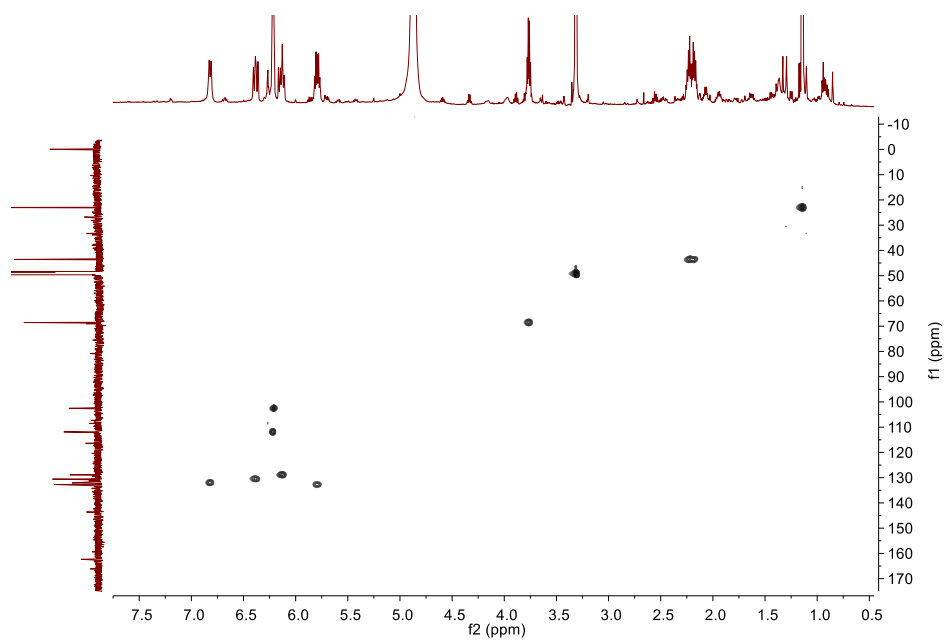

**Figure S35** HSQC spectrum of compound **4** (in  $\text{CD}_3\text{OD}$ )

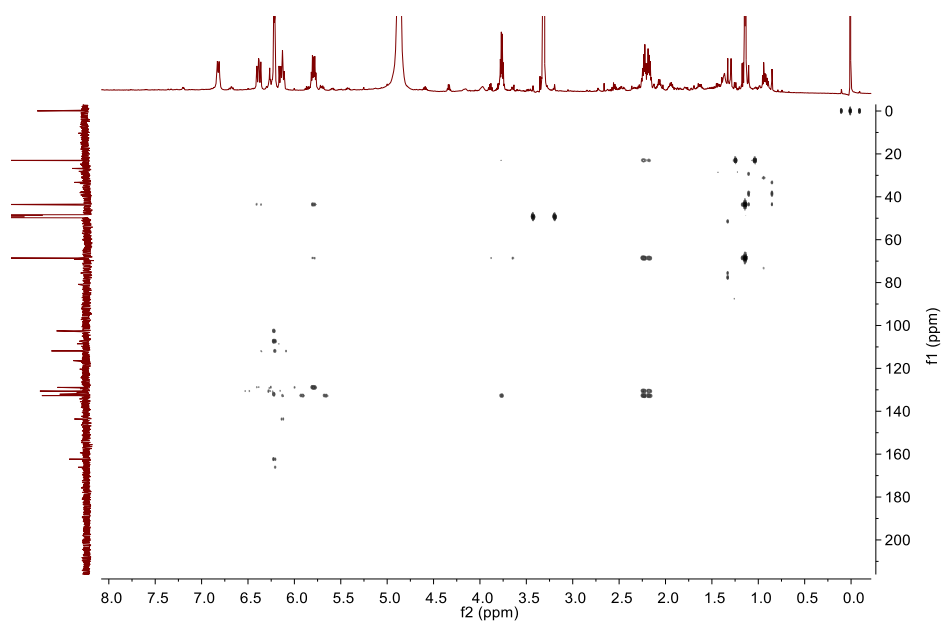

**Figure S36** HMBC spectrum of compound **4** (in CD<sub>3</sub>OD)

#### Elemental Composition Report

Page 1

##### Single Mass Analysis

Tolerance = 5.0 PPM / DBE: min = 0.0, max = 50.0

Element prediction: Off

Number of isotope peaks used for i-FIT = 3

Monoisotopic Mass, Even Electron Ions

35 formula(e) evaluated with 1 results within limits (up to 50 closest results for each mass)

Elements Used:

C: 0-50 H: 0-100 O: 0-50

TW58-16-78-8-1

20200803044 81 (0.662)

1: TOF MS ES-  
1.06e+002

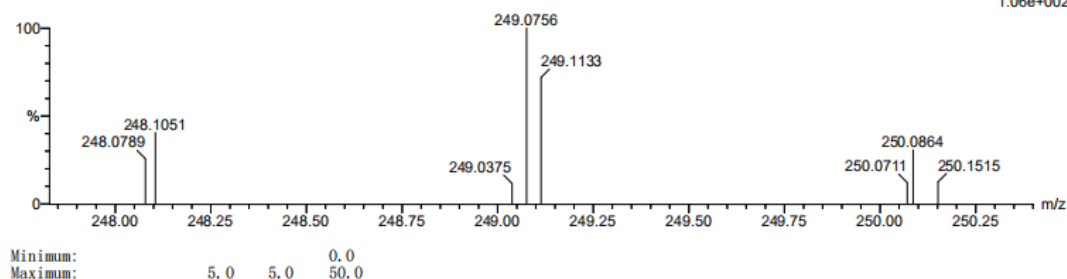

|          |            |     |     |     |       |      |          |            |  |
|----------|------------|-----|-----|-----|-------|------|----------|------------|--|
| Minimum: |            |     |     |     |       |      |          |            |  |
| Maximum: | 5.0        | 5.0 |     |     | 0.0   |      |          |            |  |
| Mass     | Calc. Mass | mDa | PPM | DBE | i-FIT | Norm | Conf (%) | Formula    |  |
| 249.1133 | 249.1127   | 0.6 | 2.4 | 6.5 | 27.1  | n/a  | n/a      | C14 H17 O4 |  |

**Figure S37** HR-ESI-MS spectrum of compound **5**

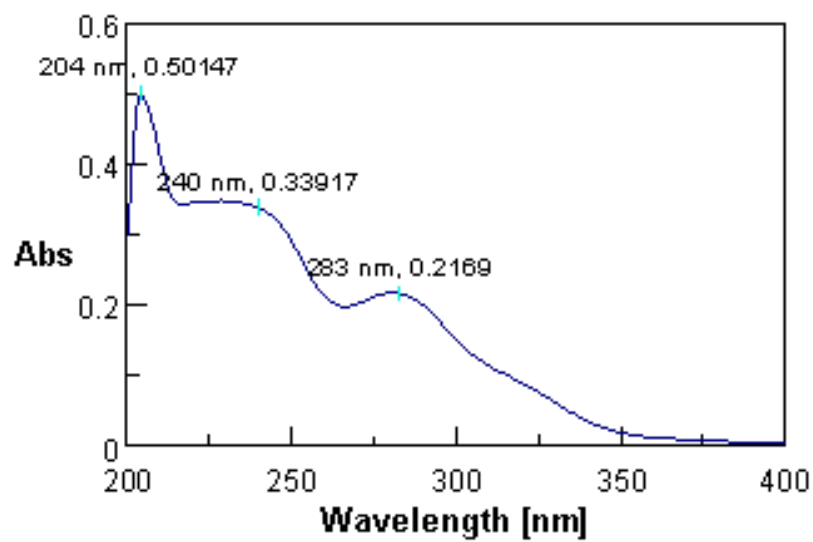

**Figure S38** UV spectrum of compound **5**

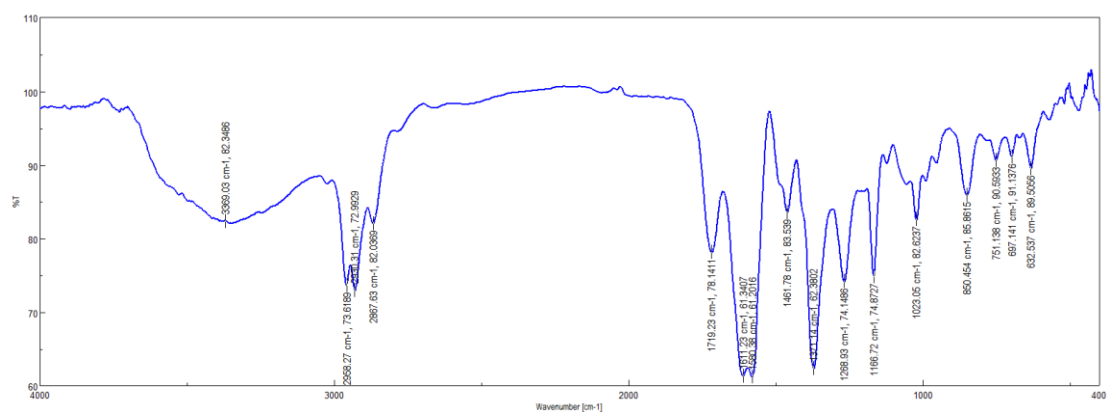

**Figure S39** IR spectrum of compound **5**

Tw58-16-78-8-1  
 HC201912090, xiejianbo  
 PROTON MeOD [D:\Data] gouxiaoshuang 12

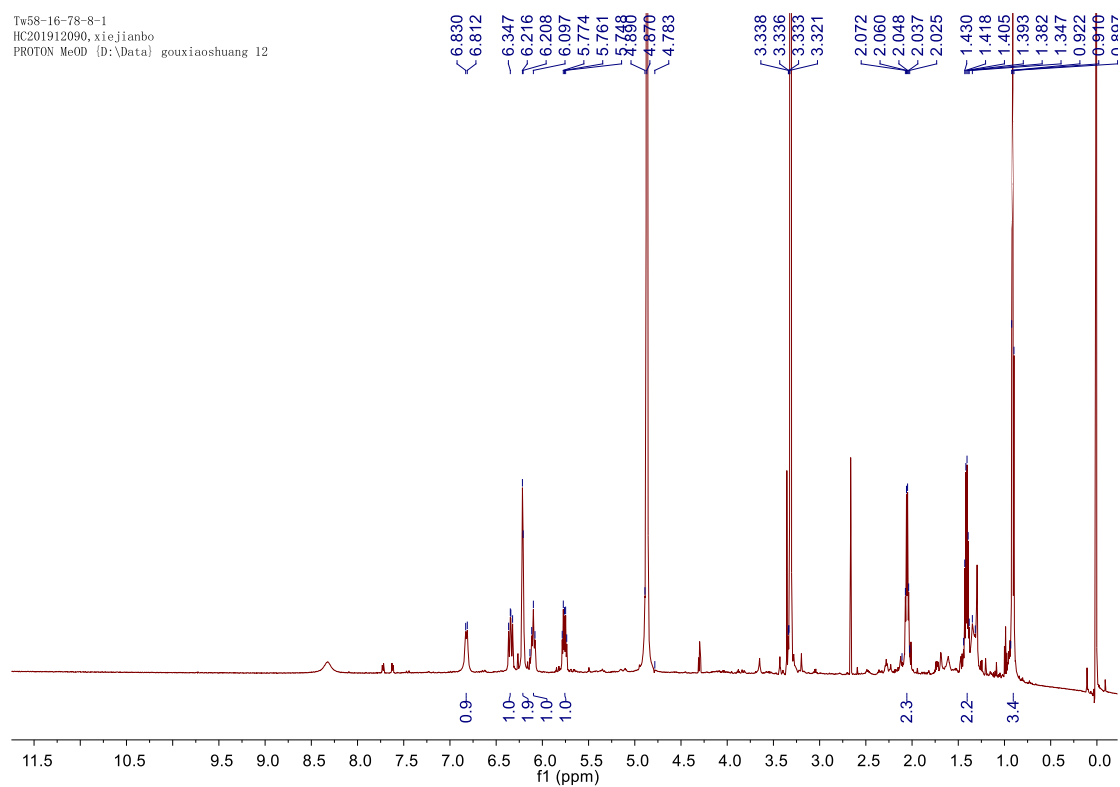

**Figure S40**  $^1\text{H}$ -NMR spectrum of compound **5** (in  $\text{CD}_3\text{OD}$ )

Tw58-16-78-8-1  
 HC201912090, xiejianbo  
 C13CPD MeOD [D:\Data] gouxiaoshuang 12

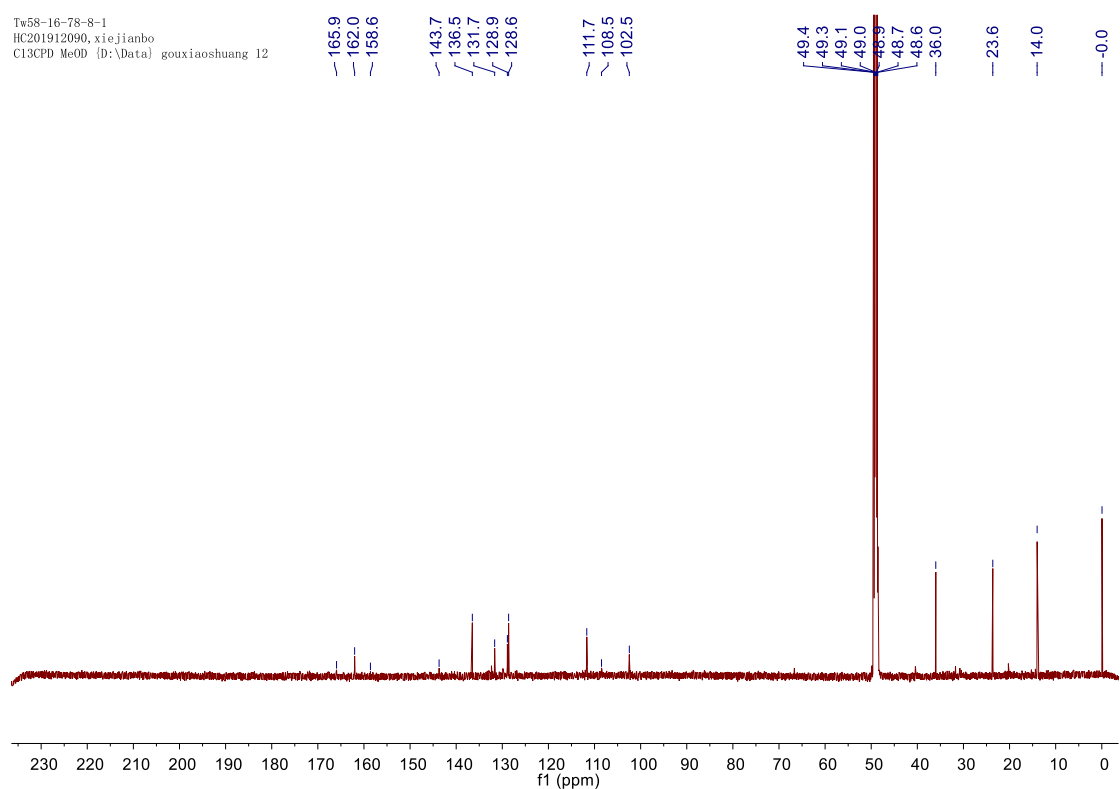

**Figure S41**  $^{13}\text{C}$ -NMR spectrum of compound **5** (in  $\text{CD}_3\text{OD}$ )

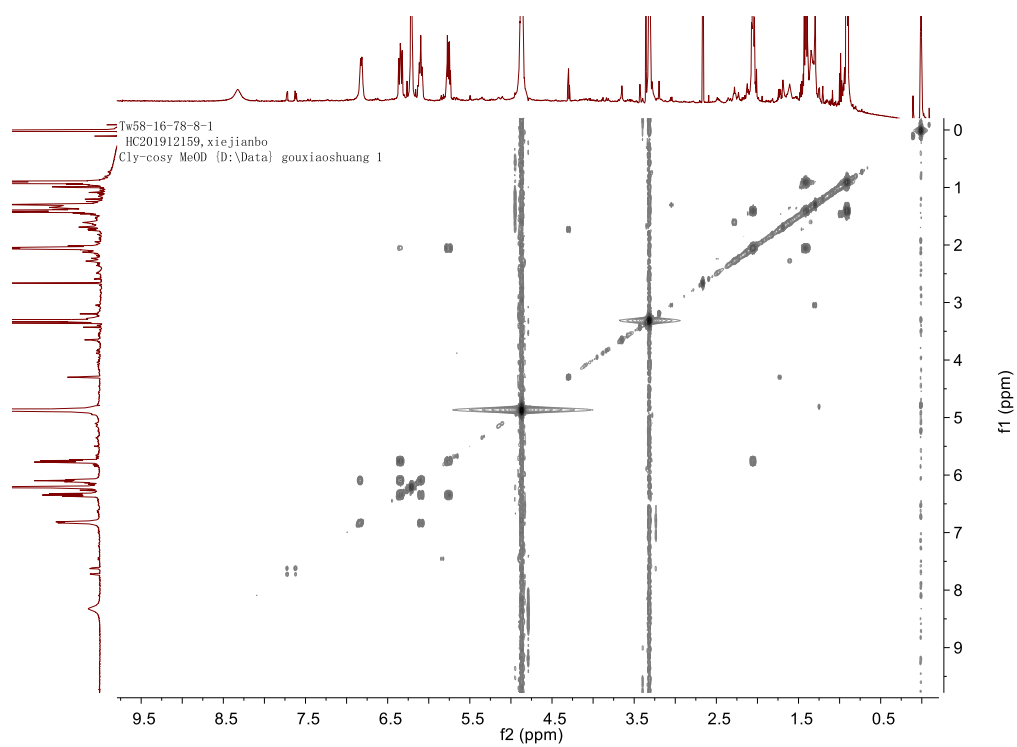

**Figure S42**  $^1\text{H}$ - $^1\text{H}$  COSY spectrum of compound **5** (in  $\text{CD}_3\text{OD}$ )

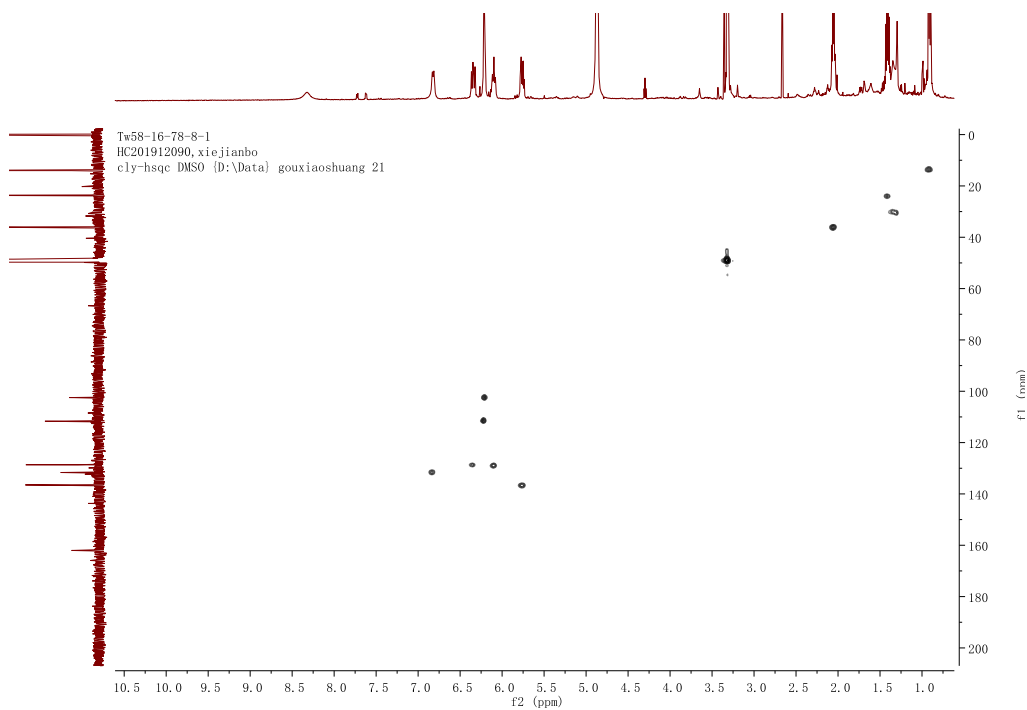

**Figure S43** HSQC spectrum of compound **5** (in  $\text{CD}_3\text{OD}$ )

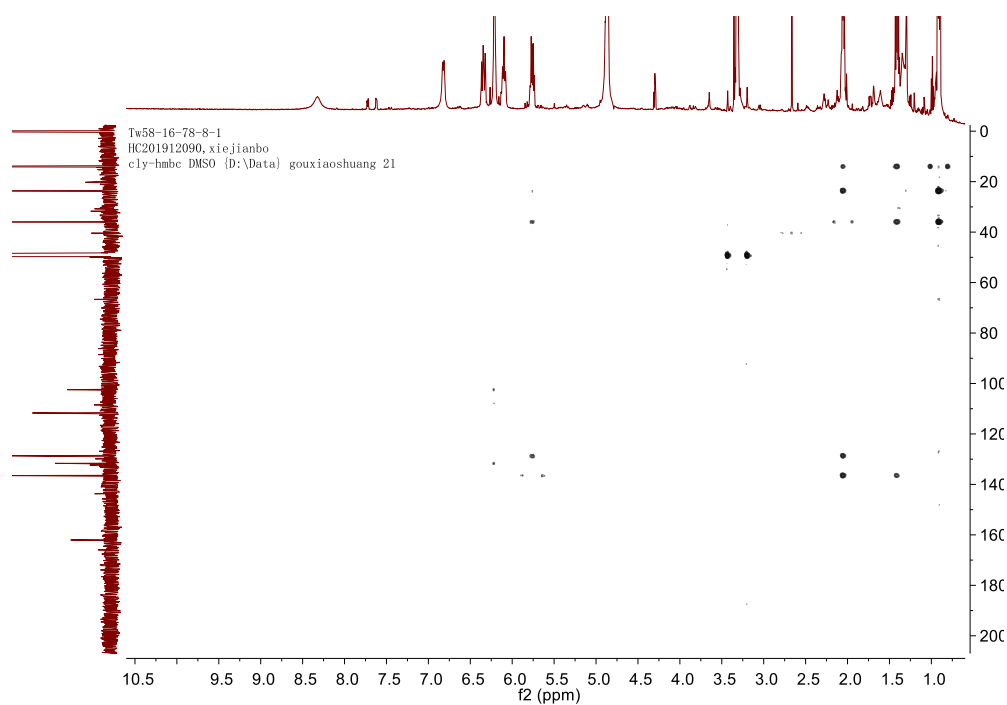

**Figure S44** HMBC spectrum of compound **5** (in CD<sub>3</sub>OD)

#### Single Mass Analysis

Tolerance = 5.0 mDa / DBE: min = -1.5, max = 50.0

Element prediction: Off

Number of isotope peaks used for i-FIT = 3

Monoisotopic Mass, Even Electron Ions

247 formula(e) evaluated with 6 results within limits (up to 50 best isotopic matches for each mass)

Elements Used:

C: 0-500 H: 0-1000 N: 0-200 O: 0-200

20190923008 75 (0.617)

1: TOF MS ES+  
1.81e+004

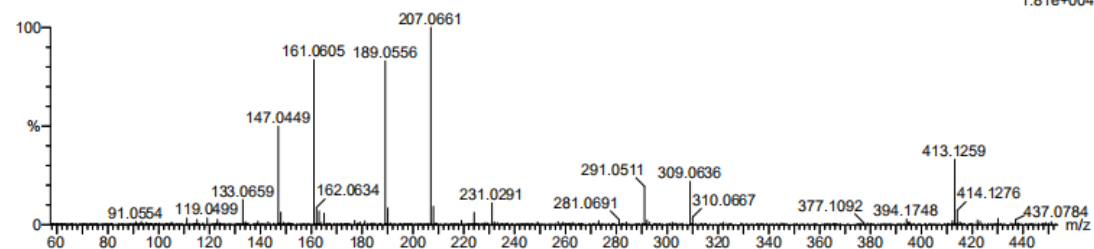

Minimum: 5.0 10.0 -1.5  
Maximum: 50.0

| Mass     | Calc. Mass | mDa  | PPM   | DBE  | i-FIT | Norm   | Conf (%) | Formula      |
|----------|------------|------|-------|------|-------|--------|----------|--------------|
| 207.0661 | 207.0657   | 0.4  | 1.9   | 6.5  | 156.6 | 1.833  | 15.99    | C11 H11 O4   |
|          | 207.0671   | -1.0 | -4.8  | 11.5 | 156.9 | 2.111  | 12.11    | C12 H7 N4    |
|          | 207.0689   | -2.8 | -13.5 | -1.5 | 167.2 | 12.369 | 0.00     | H11 N6 O7    |
|          | 207.0630   | 3.1  | 15.0  | 7.5  | 155.2 | 0.356  | 70.04    | C7 H7 N6 O2  |
|          | 207.0703   | -4.2 | -20.3 | 3.5  | 164.5 | 9.685  | 0.01     | C H7 N10 O3  |
|          | 207.0617   | 4.4  | 21.2  | 2.5  | 158.8 | 3.987  | 1.86     | C6 H11 N2 O6 |

**Figure S45** HR-ESI-MS spectrum of compound **6**

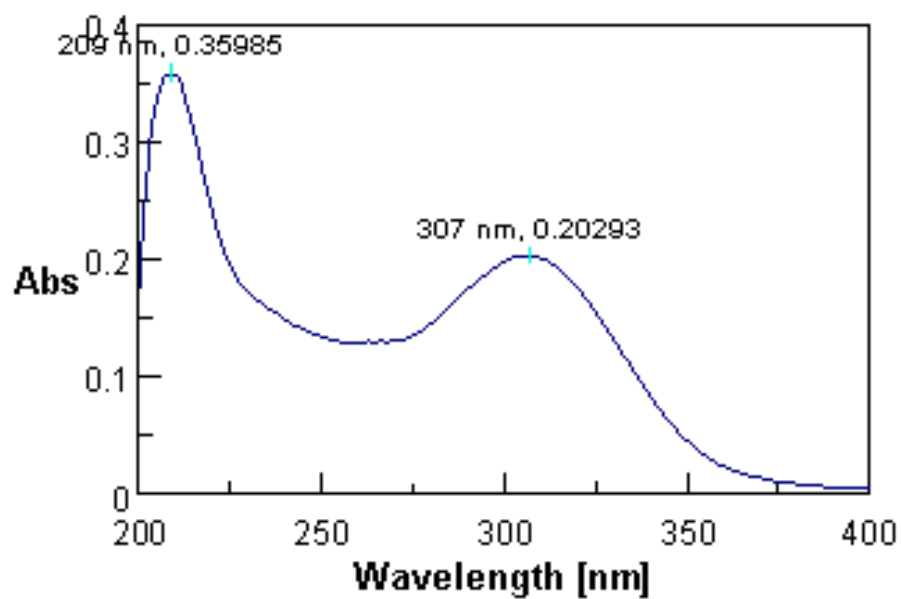

**Figure S46** UV spectrum of compound **6**

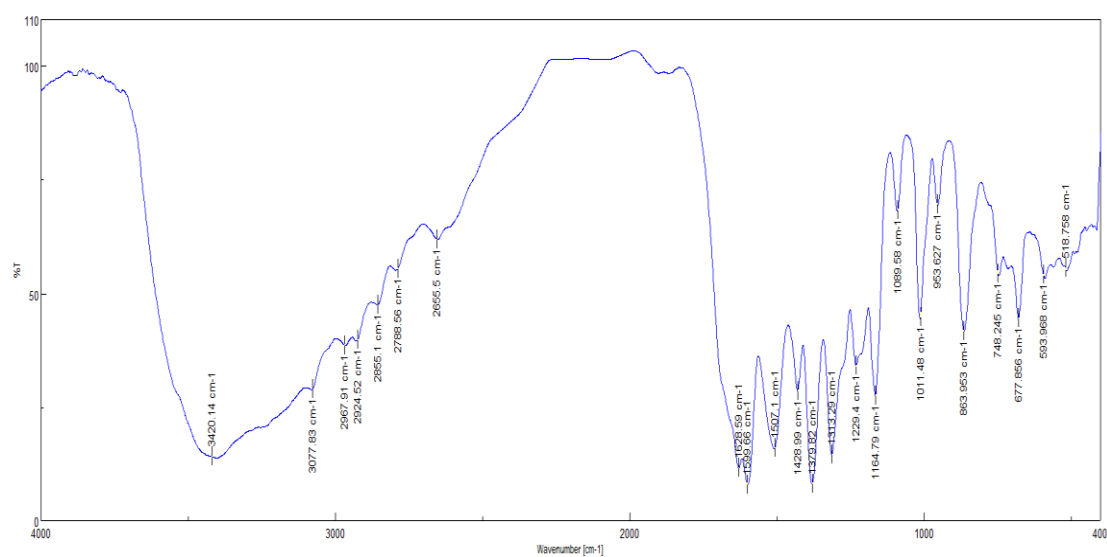

**Figure S47** IR spectrum of compound **6**



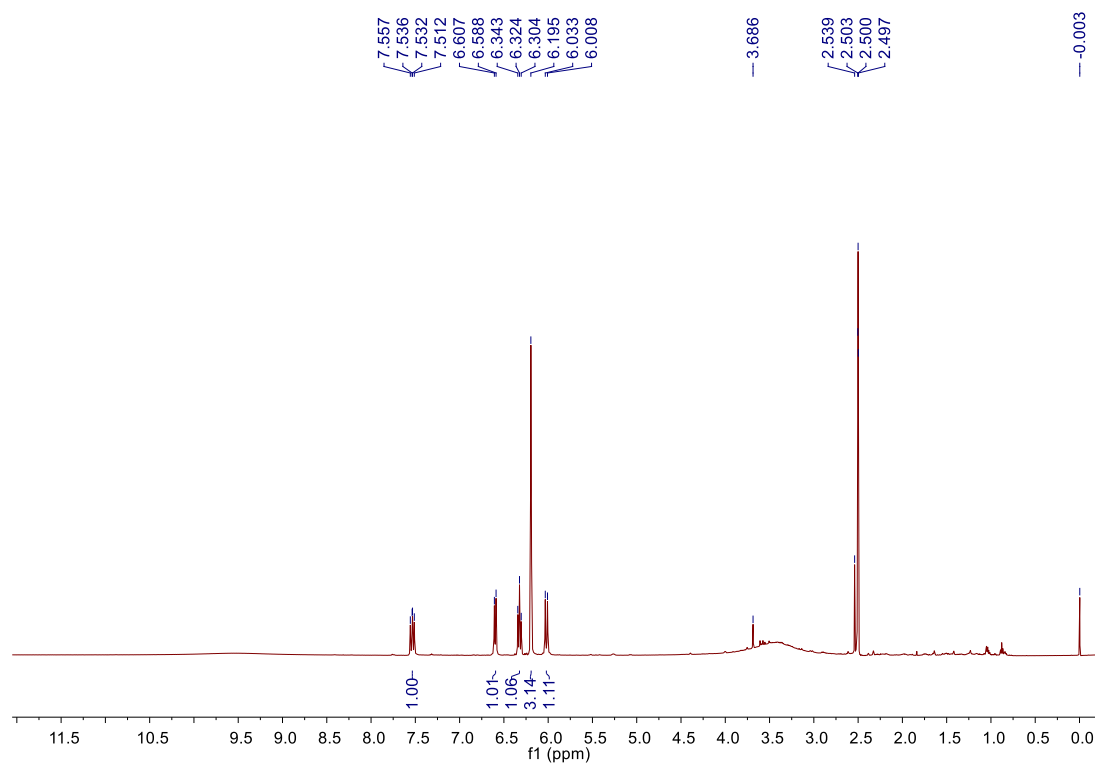

**Figure S48** <sup>1</sup>H-NMR spectrum of compound **6** (in DMSO-*d*<sub>6</sub>)

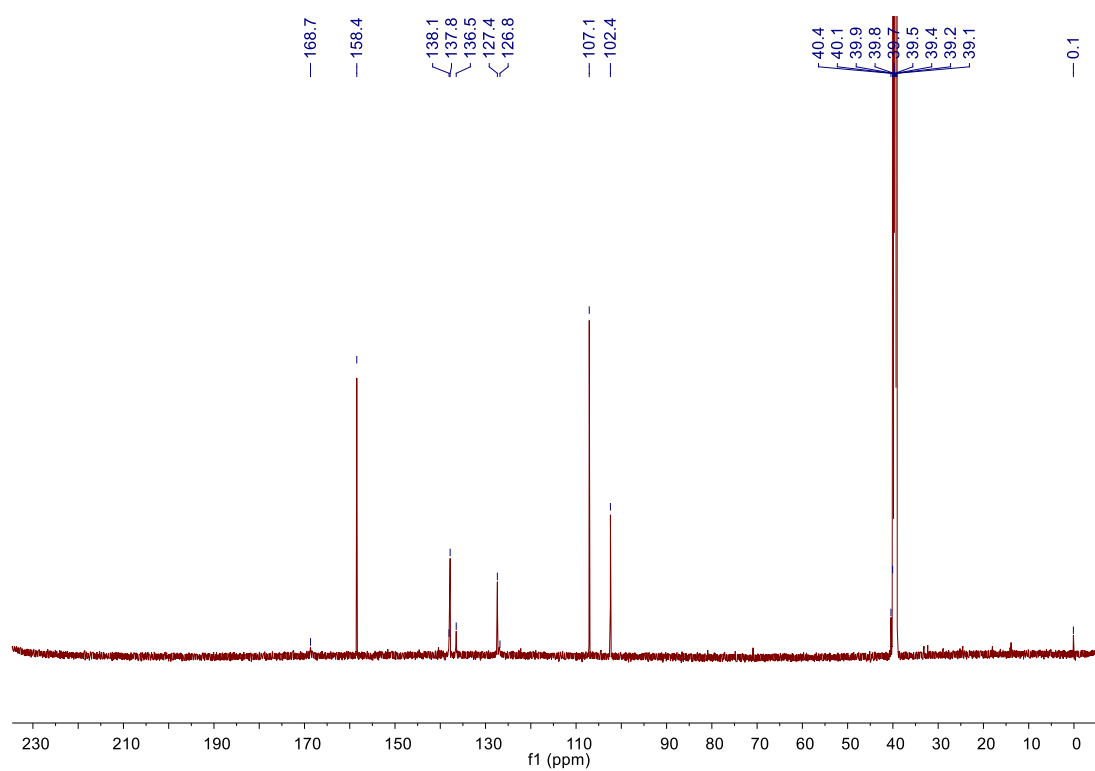

**Figure S49** <sup>13</sup>C-NMR spectrum of compound **6** (in DMSO-*d*<sub>6</sub>)

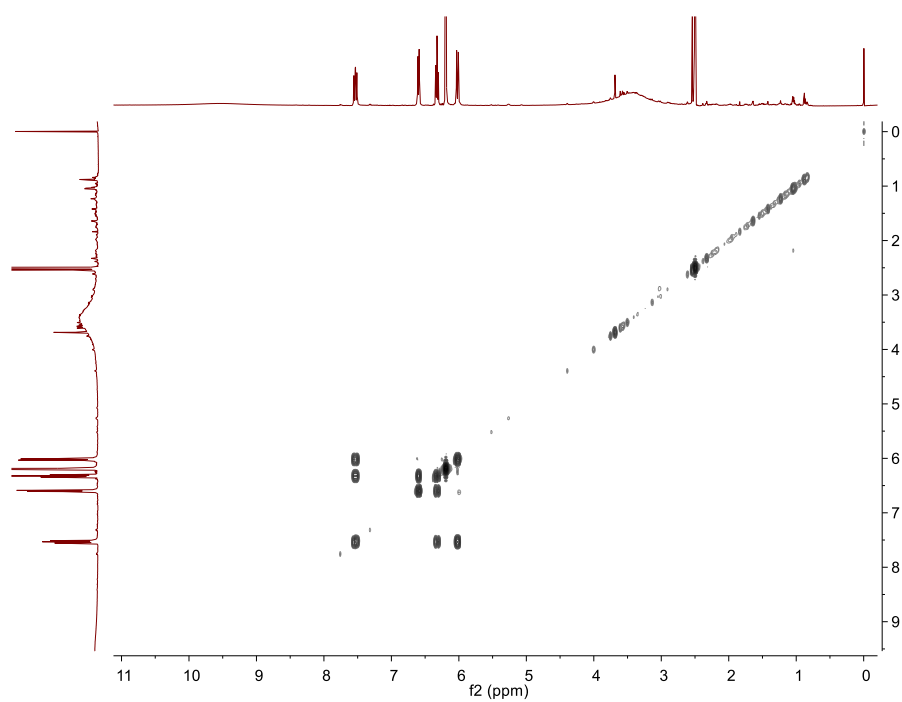

**Figure S50**  $^1\text{H}$ - $^1\text{H}$  COSY spectrum of compound **6** (in  $\text{DMSO-}d_6$ )

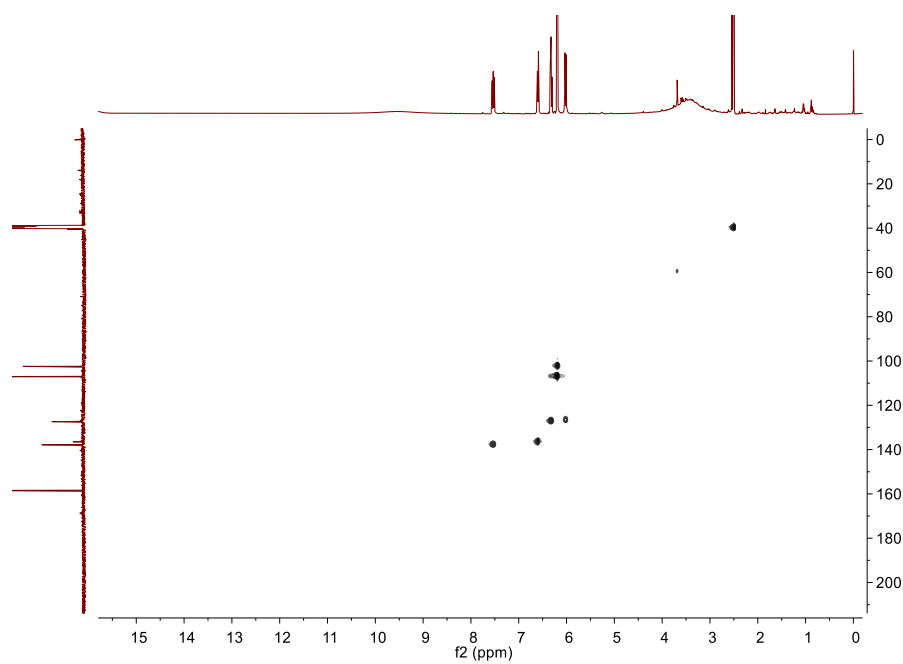

**Figure S51** HSQC spectrum of compound **6** (in  $\text{DMSO-}d_6$ )

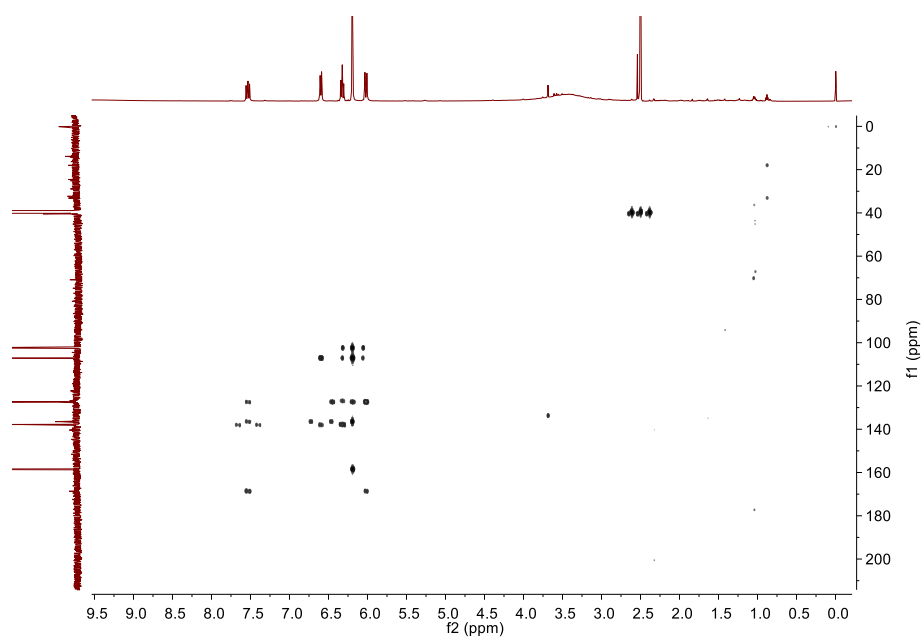

**Figure S52** HMBC spectrum of compound **6** (in DMSO- $d_6$ )

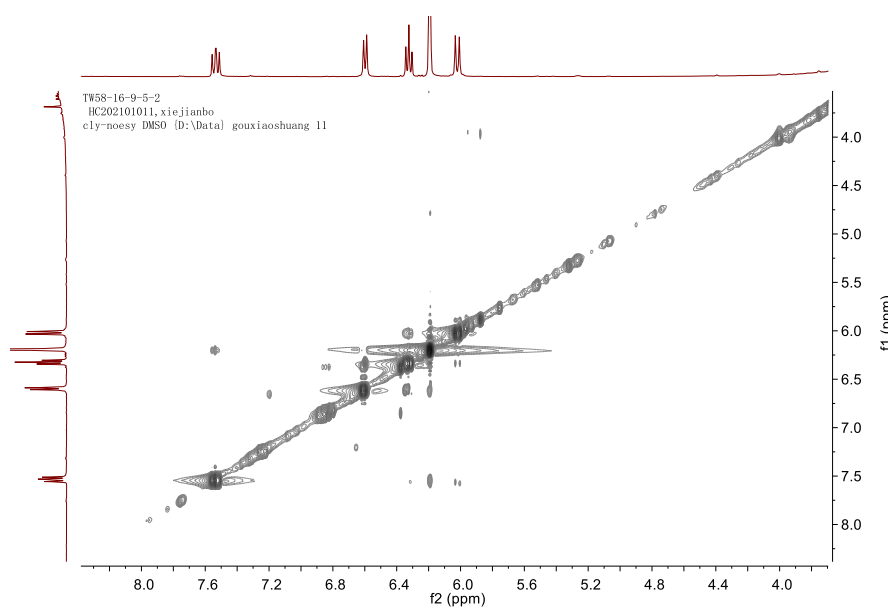

**Figure S53** NOESY spectrum of compound **6** (in DMSO- $d_6$ )

### Single Mass Analysis

Tolerance = 5.0 mDa / DBE: min = -1.5, max = 50.0

Element prediction: Off

Number of isotope peaks used for i-FIT = 3

Monoisotopic Mass, Even Electron Ions

78 formula(e) evaluated with 2 results within limits (up to 50 best isotopic matches for each mass)

Elements Used:

C: 0-500 H: 0-1000 O: 0-200 Na: 0-1

20191014013 86 (0.700)

1: TOF MS ES+  
2.39e+04

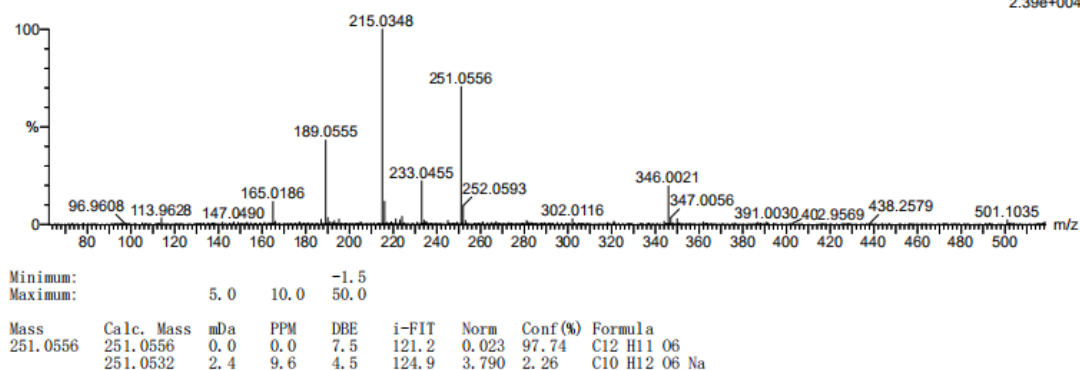

Figure S54 HR-ESI-MS spectrum of compound 7

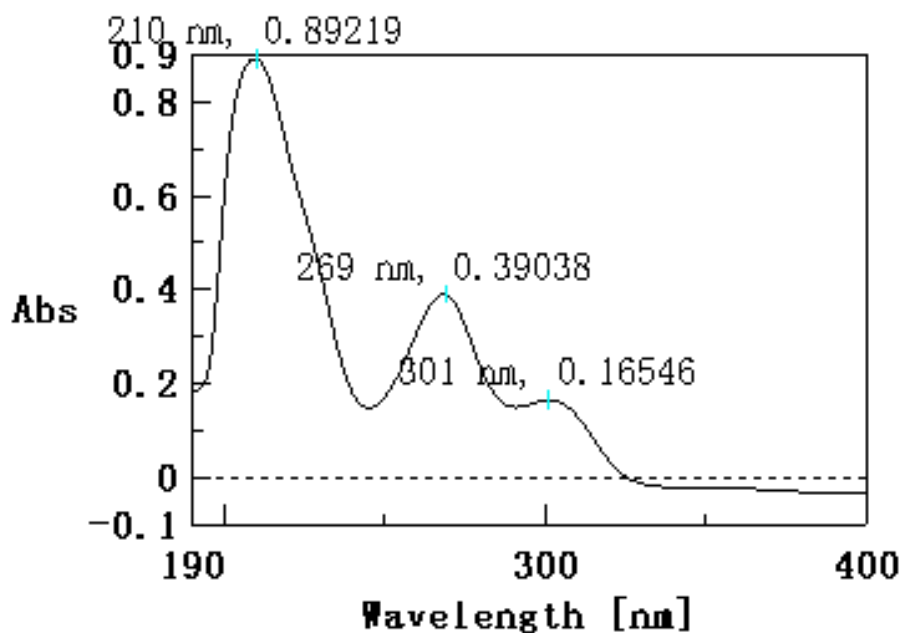

Figure S55 UV spectrum of compound 7

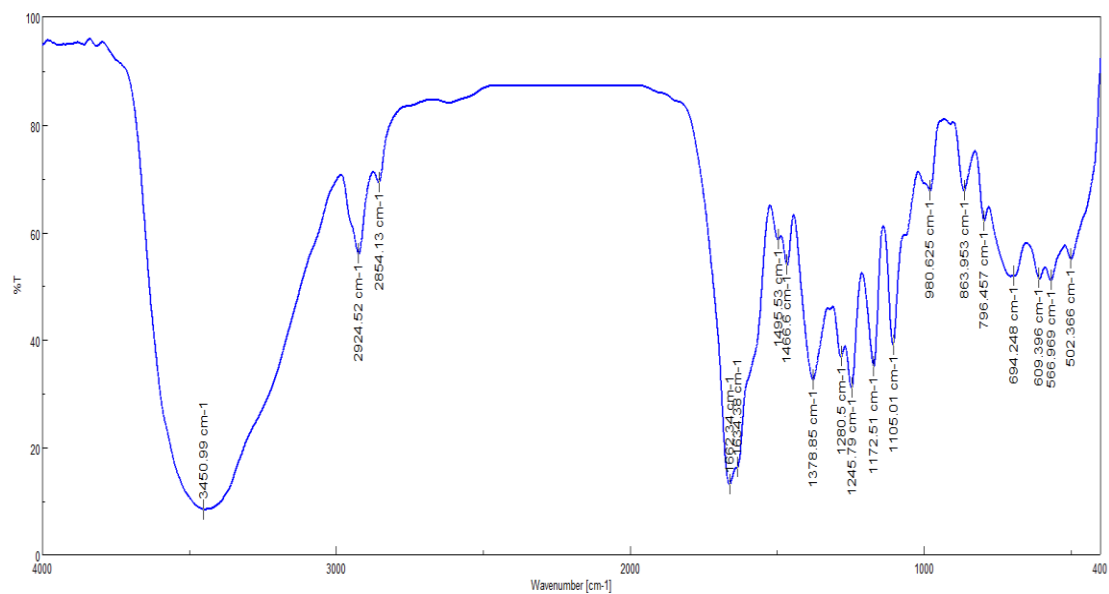

**Figure S56** IR spectrum of compound **7**

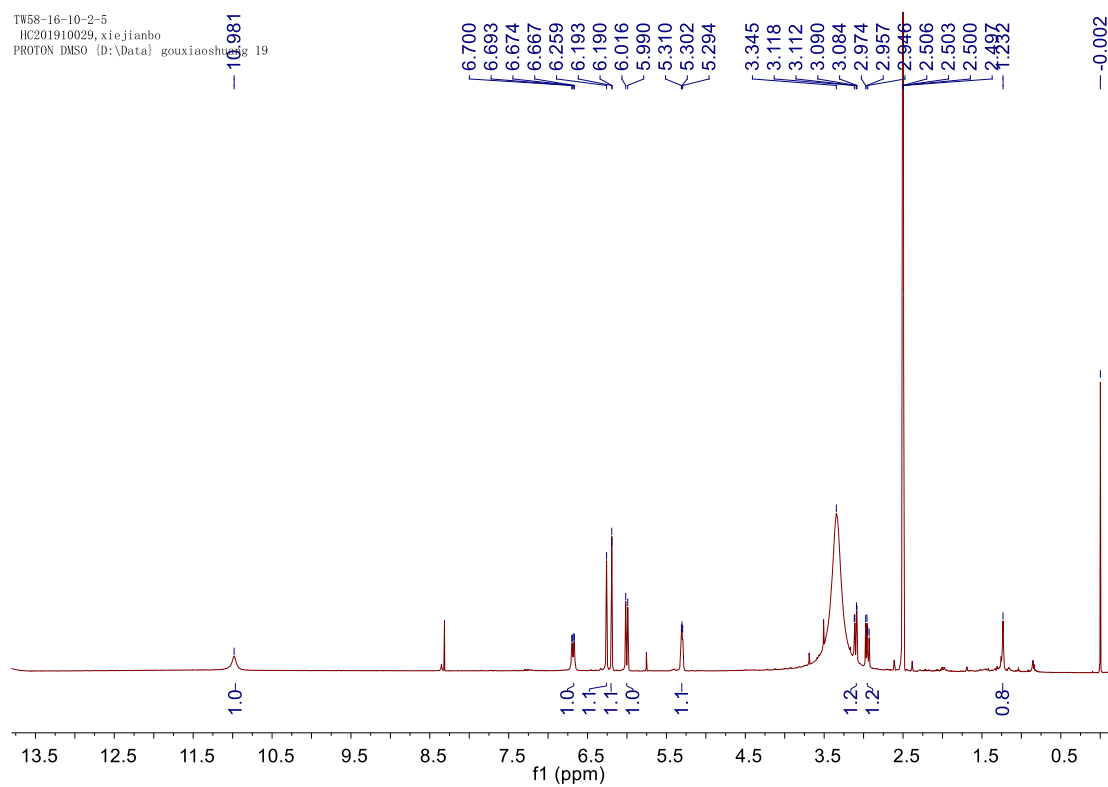

**Figure S57** The <sup>1</sup>H-NMR spectrum of compound **7** (in DMSO-*d*<sub>6</sub>)

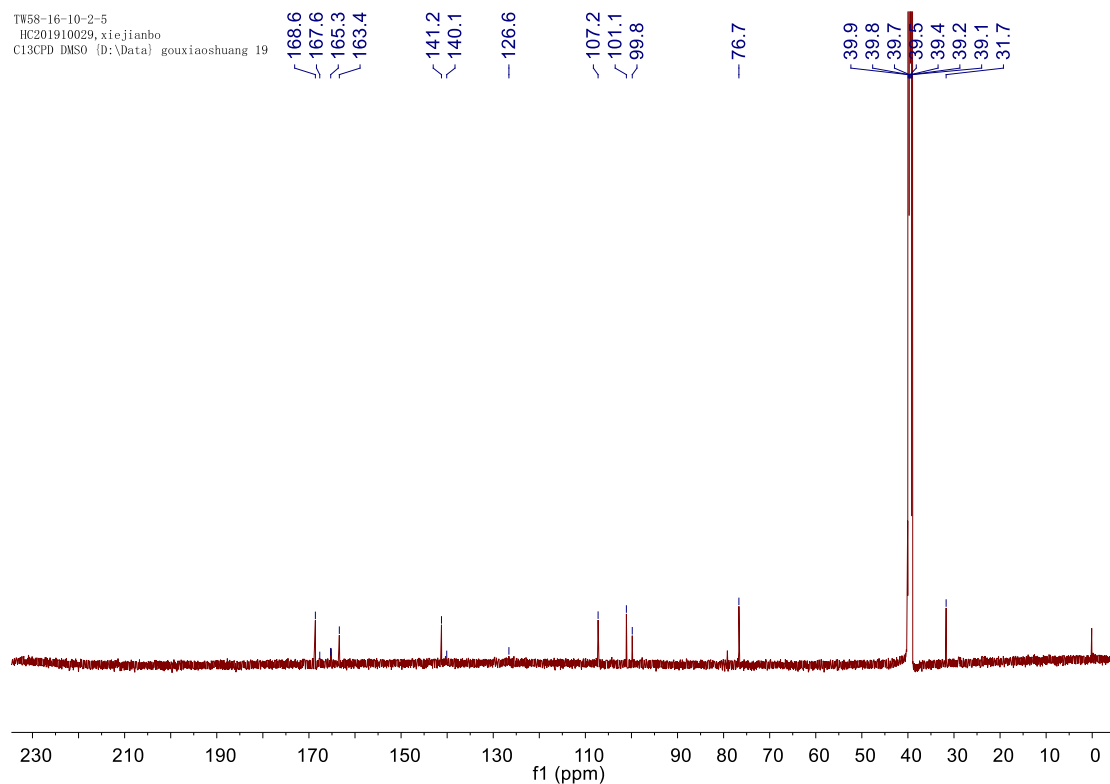

**Figure S58** The  $^{13}\text{C}$ -NMR spectrum of compound **7** (in  $\text{DMSO}-d_6$ )

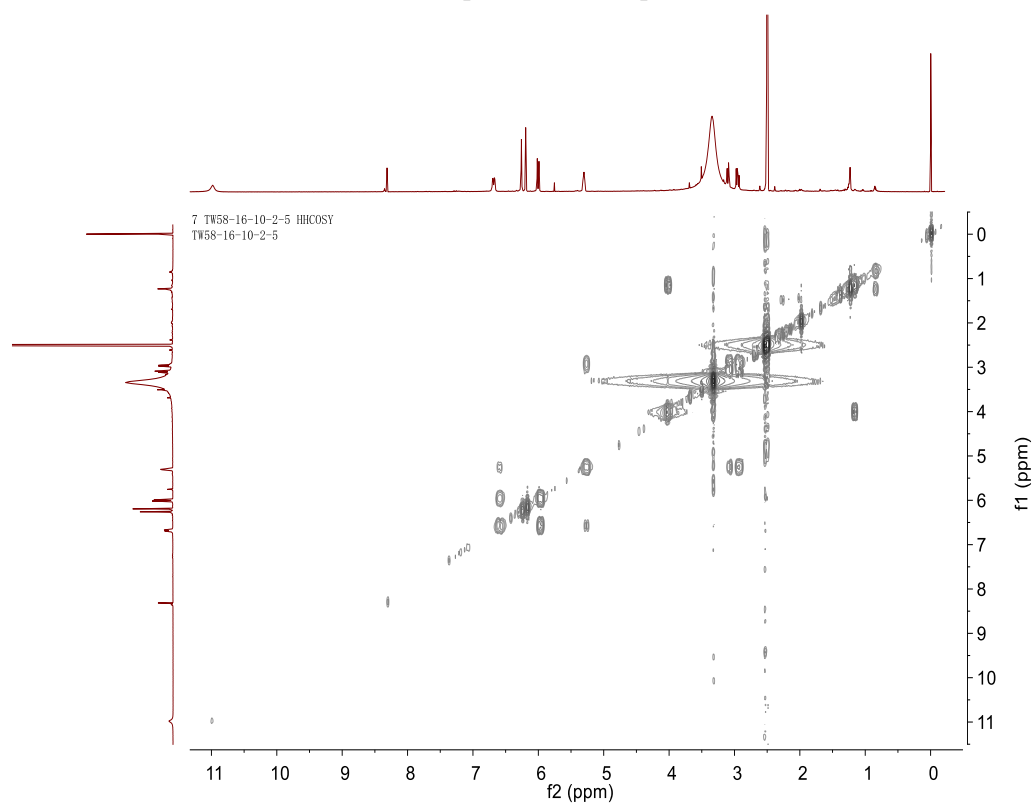

**Figure S59** The  $^1\text{H}$ - $^1\text{H}$  COSY spectrum of compound **7** (in  $\text{DMSO}-d_6$ )

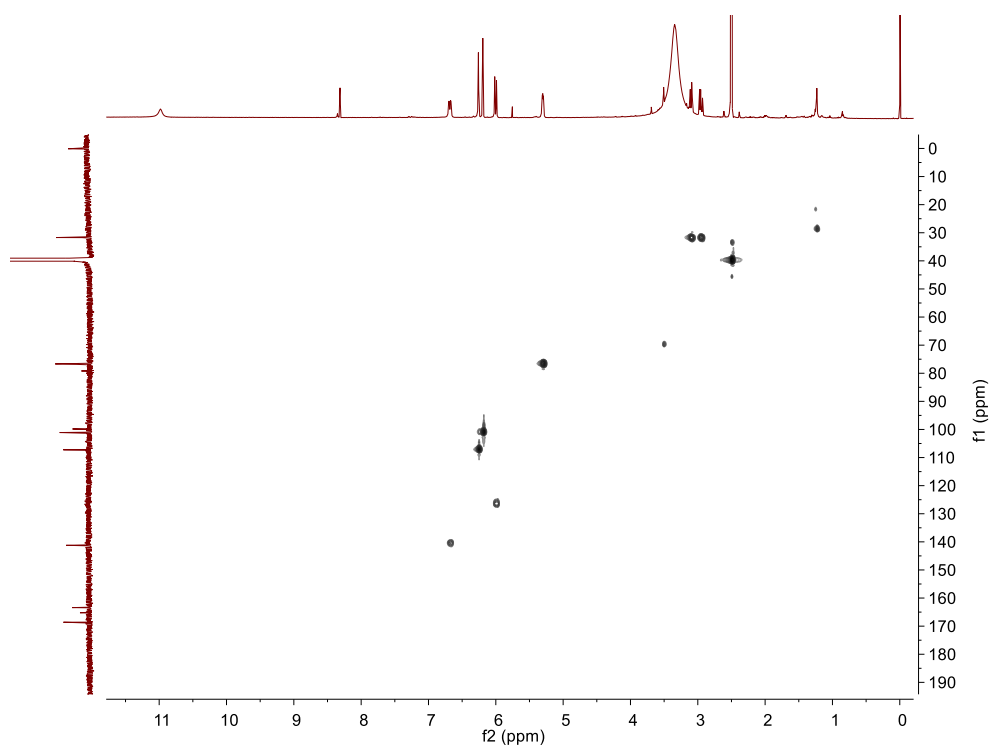

**Figure S60** The HSQC spectrum of compound **7** (in DMSO- $d_6$ )

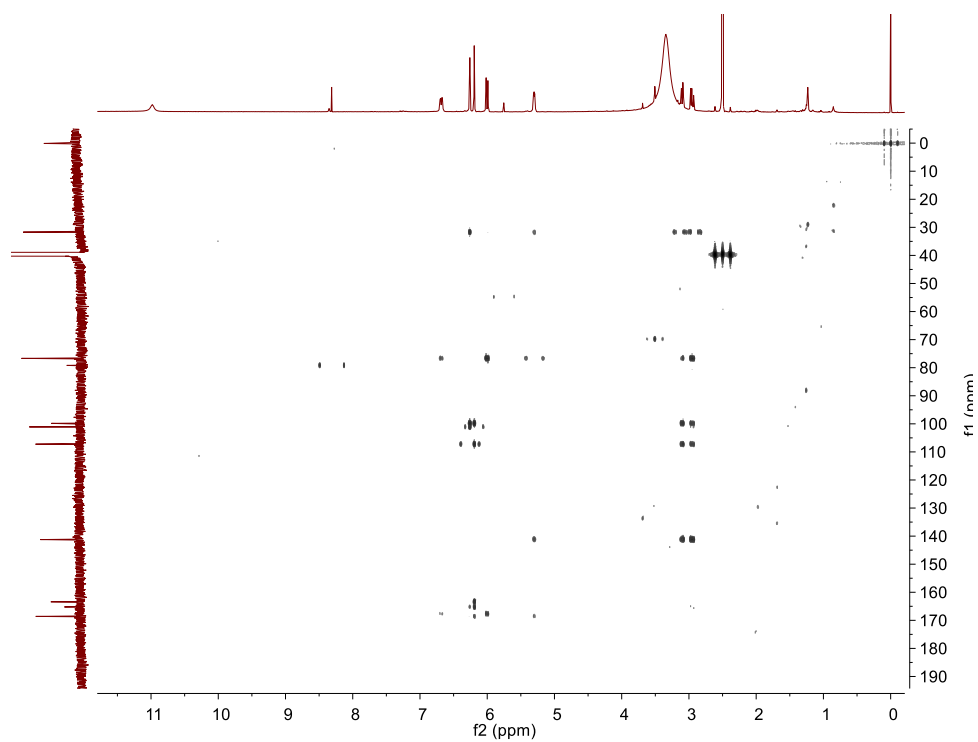

**Figure S61** The HMBC spectrum of compound **7** (in DMSO- $d_6$ )

Monoisotopic Mass, Even Electron Ions  
 37 formula(e) evaluated with 1 results within limits (up to 50 best isotopic matches for each mass)  
 Elements Used:  
 C: 0-50 H: 0-200 O: 0-50  
 TW58-16-10-2-4  
 20191104038 78 (0.640)

1: TOF MS ES+  
 2.38e+005

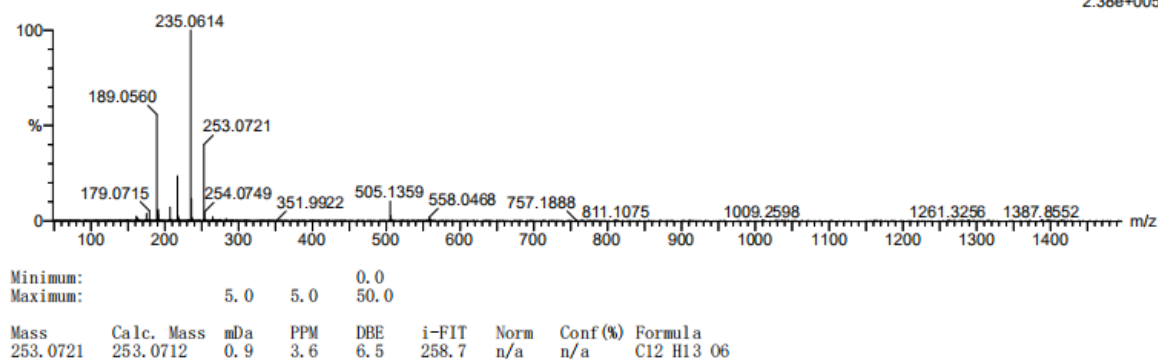

**Figure S62** HR-ESI-MS spectrum of compound **8**

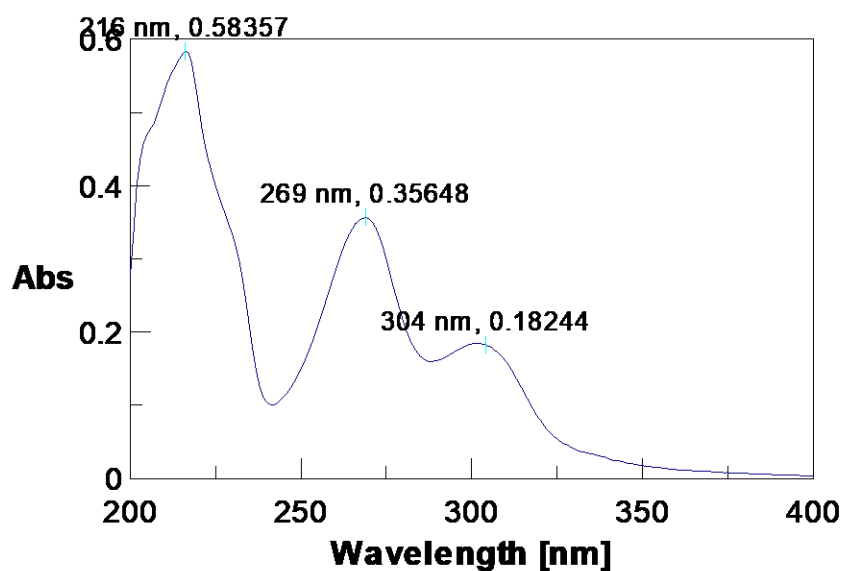

**Figure S63** The UV spectrum of compound **8**



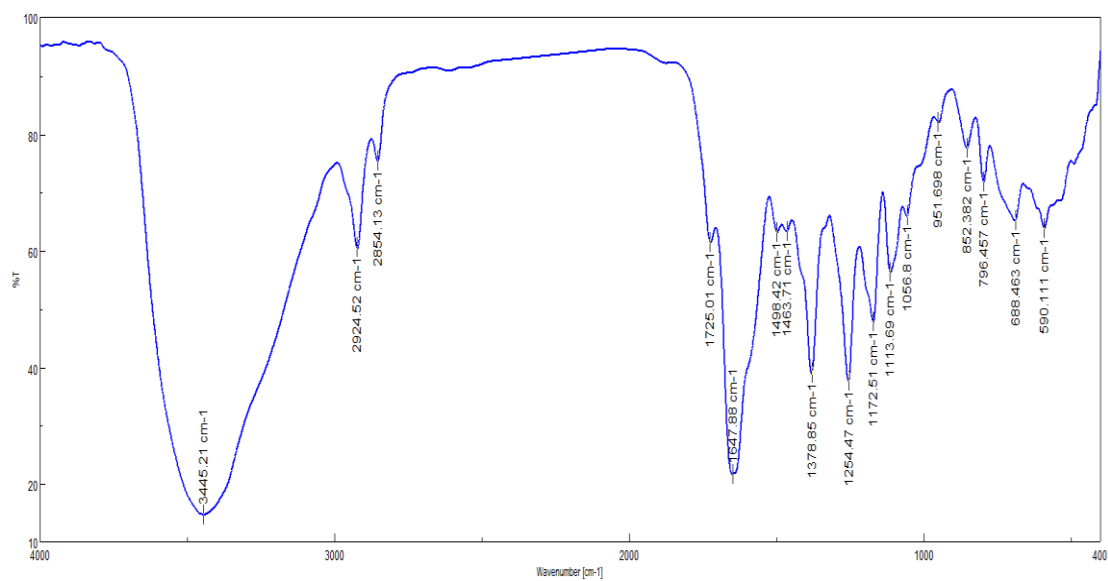

**Figure S64** IR spectrum of compound **8**

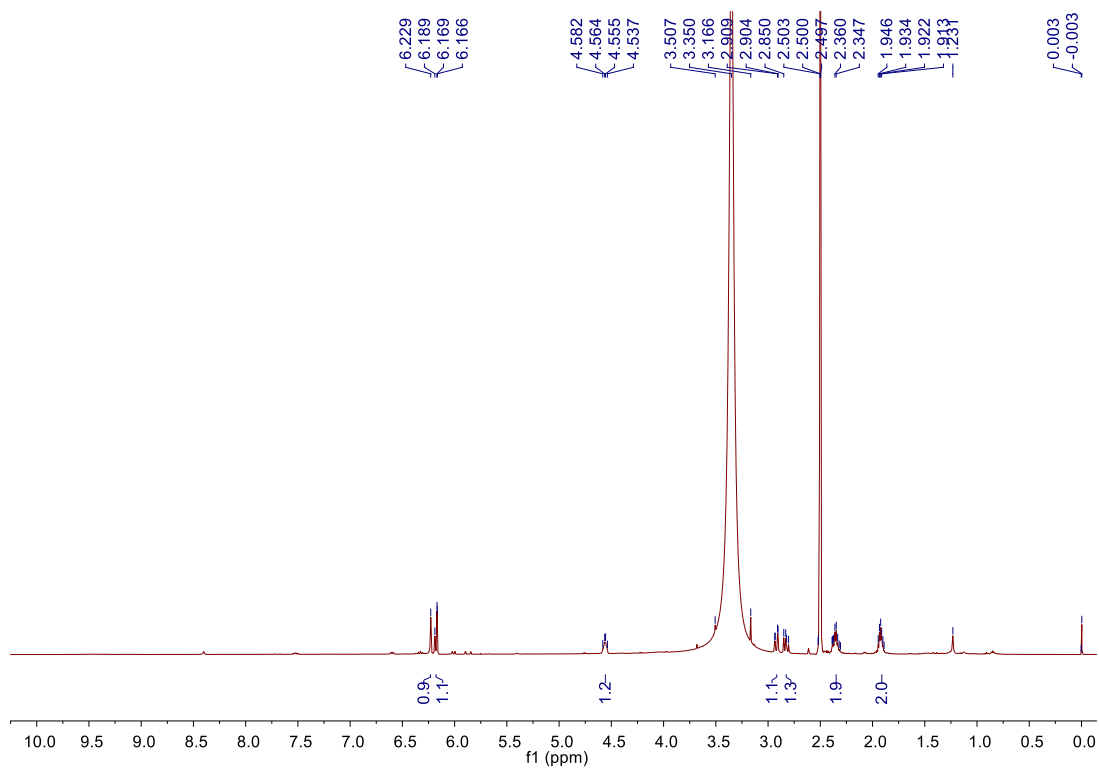

**Figure S65** The <sup>1</sup>H-NMR spectrum of compound **8** (in DMSO-*d*<sub>6</sub>)

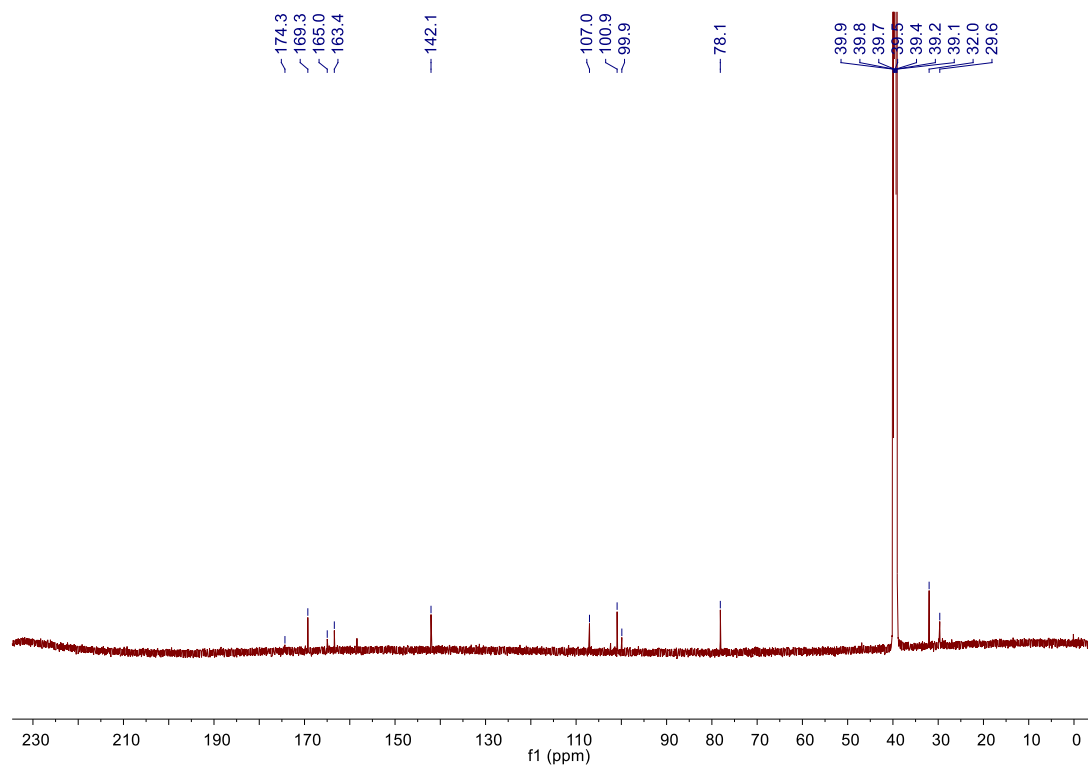

**Figure S66** The  $^{13}\text{C}$ -NMR spectrum of compound **8** (in  $\text{DMSO}-d_6$ )

Tw58-16-10-2-4  
 HC201911022, xiejianbo  
 C13DEPT135 DMSO {D:\Data\} gouxiaoshuang 20

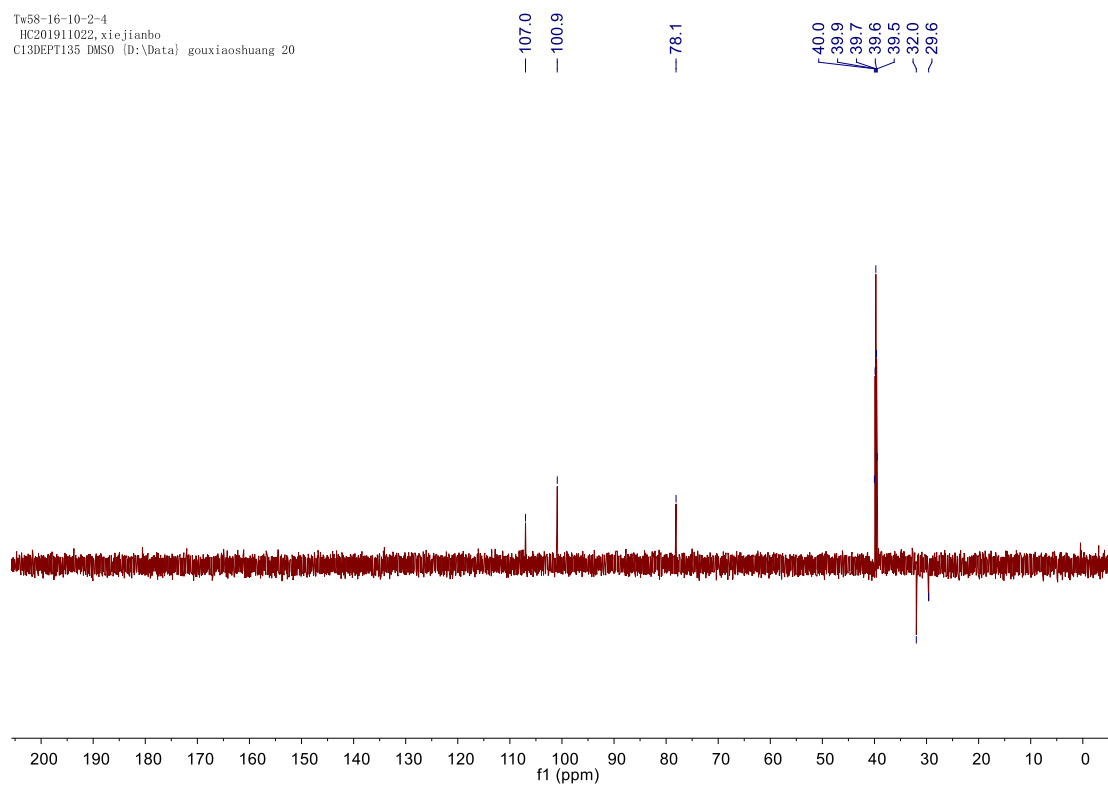

**Figure S67** The DEPT135 spectrum of compound **8** (in  $\text{DMSO}-d_6$ )

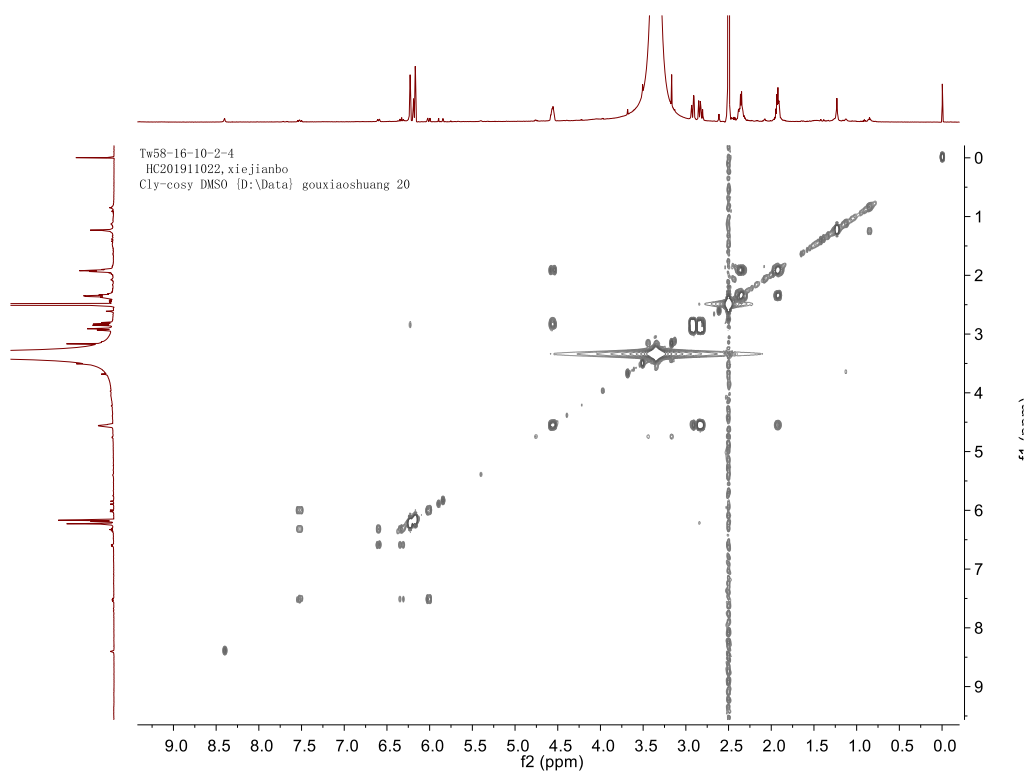

**Figure S68** The  $^1\text{H}$ - $^1\text{H}$  COSY spectrum of compound **8** (in  $\text{DMSO-}d_6$ )

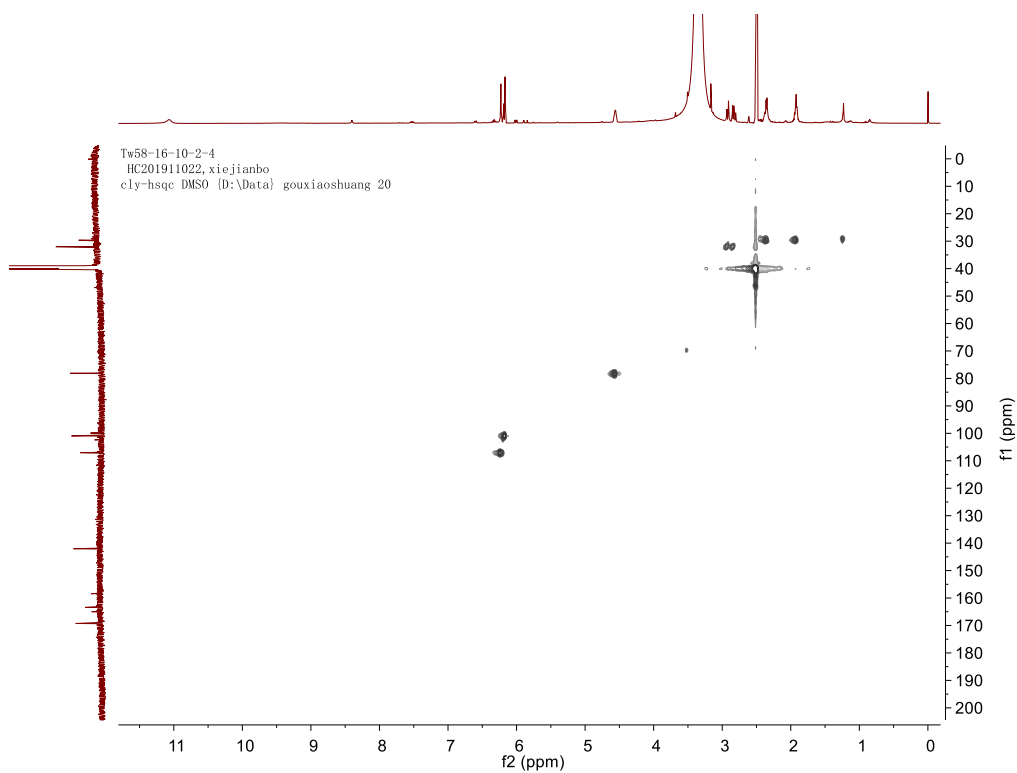

**Figure S69** The HSQC spectrum of compound **8** (in  $\text{DMSO-}d_6$ )

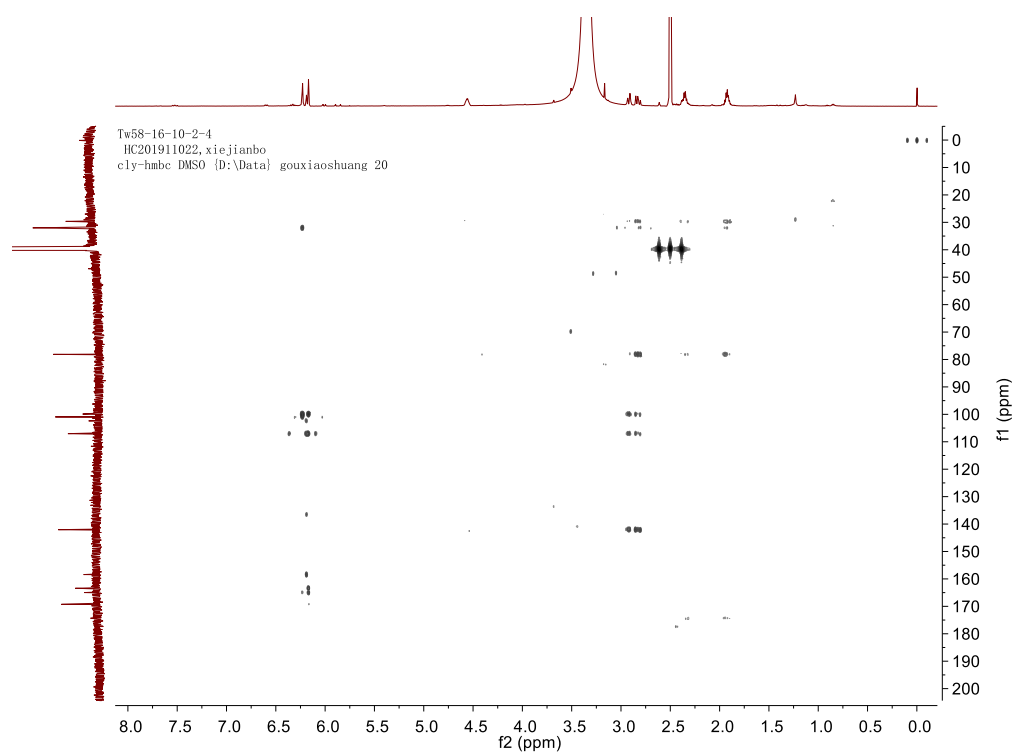

**Figure S70** The HMBC spectrum of compound **8** (in DMSO- $d_6$ )
